# Supplementary material for: Tension Stiffening and Cracking Behavior of Axially Loaded Alkali-Activated Concrete
Source: MDPI journal article supplement (doi:10.3390/ma16114120), 2023-05-31
Supplement: s1 [file s1]

## Supplementary SI

## Modes of failure of prisms

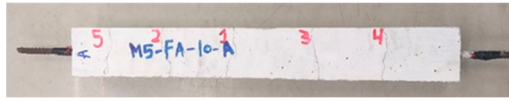

M5-FA-10-(A)

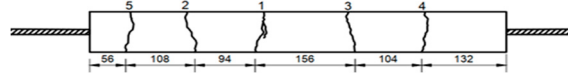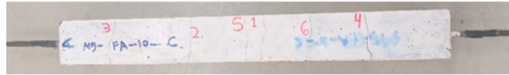

M5-FA-10-(B)

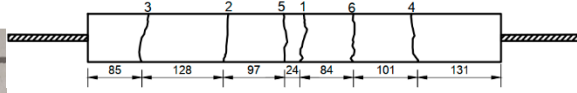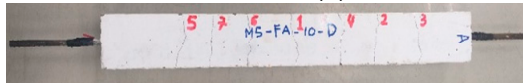

M5-FA-10-(C)

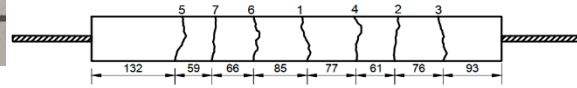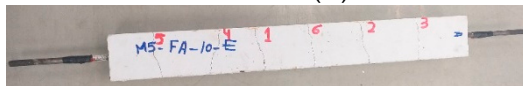

M5-FA-10-(D)

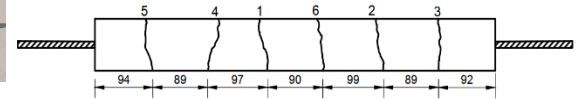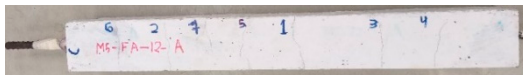

M5-FA-12-(A)

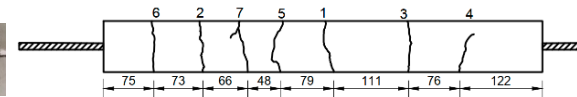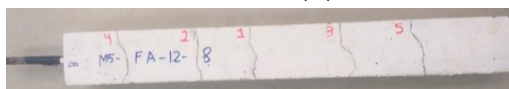

M5-FA-12-(B)

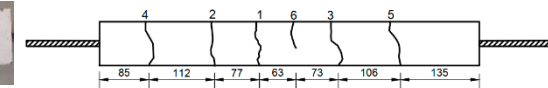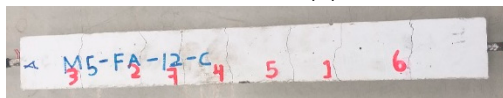

M5-FA-12-(C)

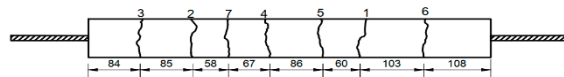

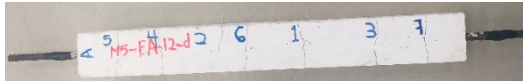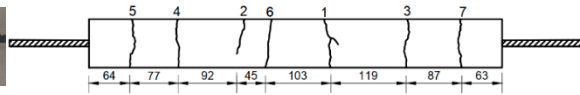

M5-FA-12-(D)

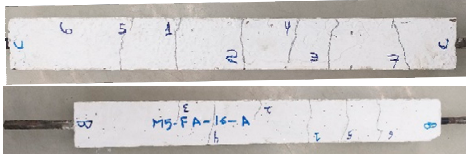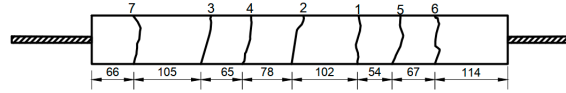

M5-FA-16-(A)

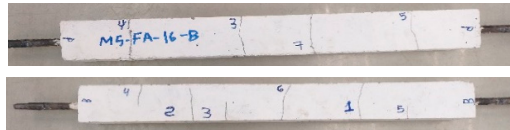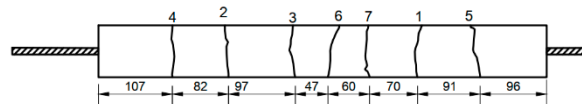

M5-FA-16-(B)

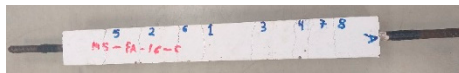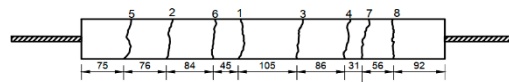

M5-FA-16-(C)

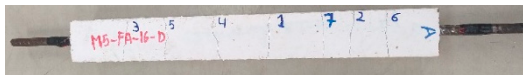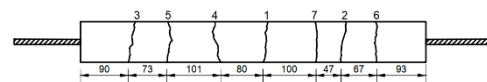

M5-FA-16-(D)

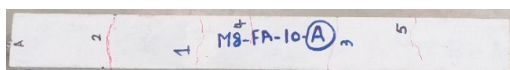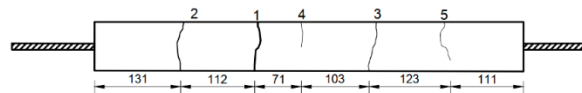

III

M8-FA-10-(A)

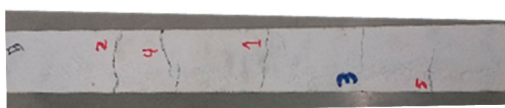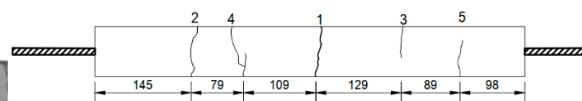

M8-FA-10-(B)

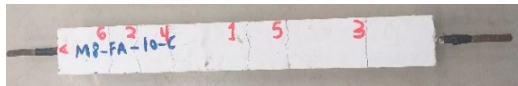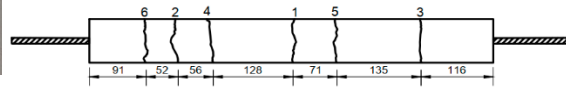

M8-FA-10-(C)

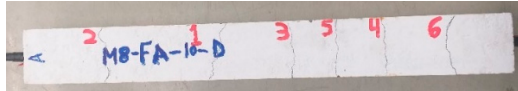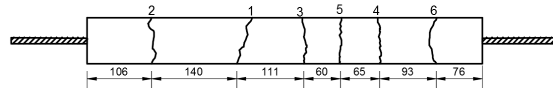

M8-FA-10-(D)

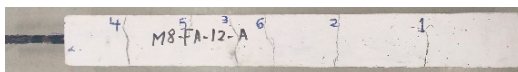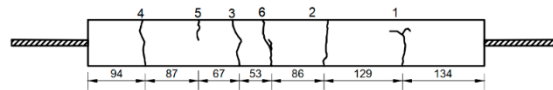

M8-FA-12-(A)

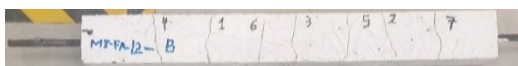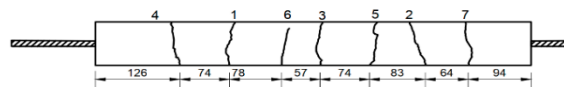

M8-FA-12-(B)

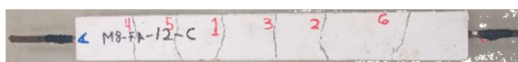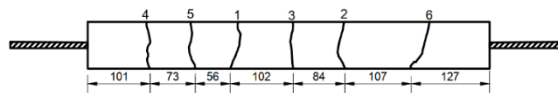

M8-FA-12-(C)

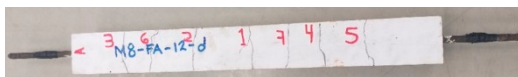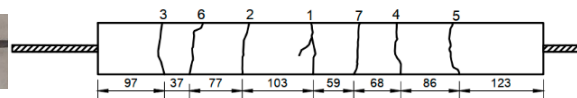

M8-FA-12-(D)

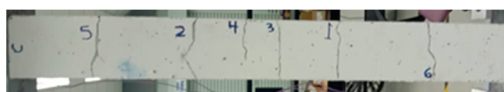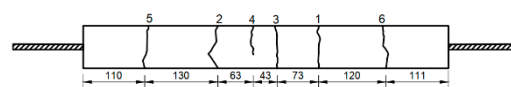

M8-FA-16-(A)

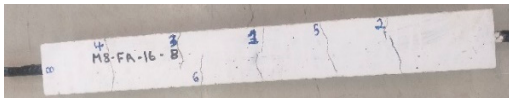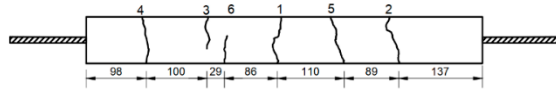

M8-FA-16-(B)

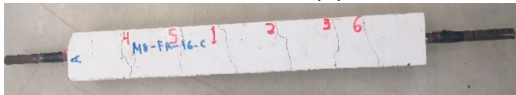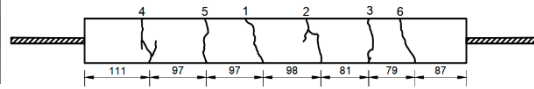

M8-FA-16-(C)

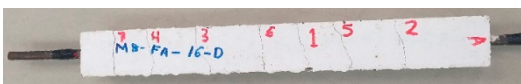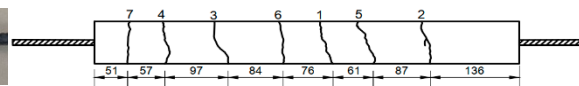

M8-FA-16-(D)

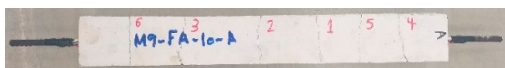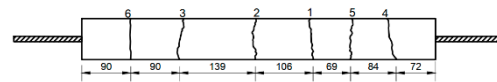

M9-FA-10-(A)

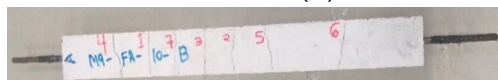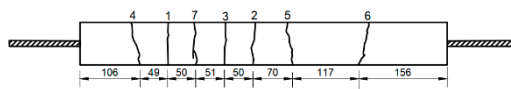

M9-FA-10-(B)

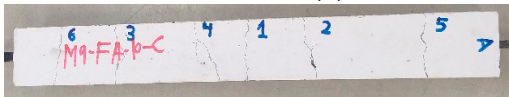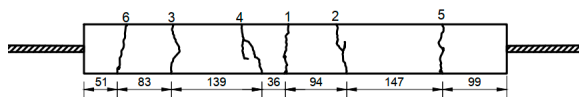

II

M9-FA-10-(C)

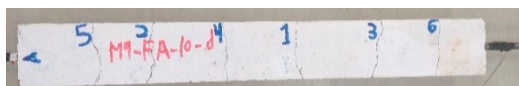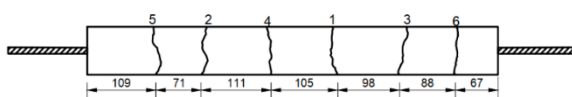

M9-FA-10-(D)

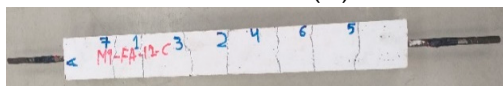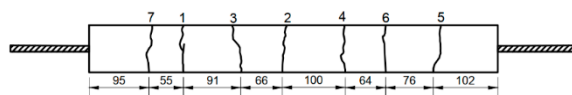

M9-FA-12-(A)

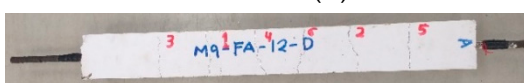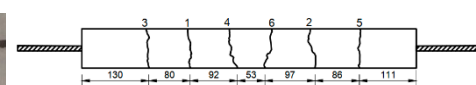

M9-FA-12-(B)

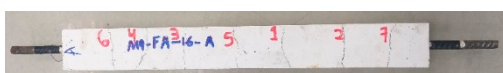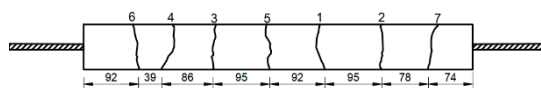

M9-FA-16-(A)

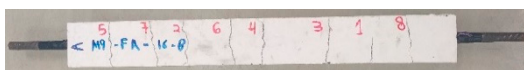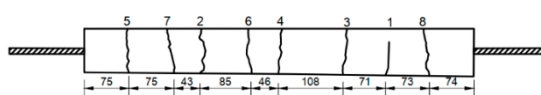

M9-FA-16-(B)

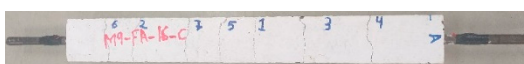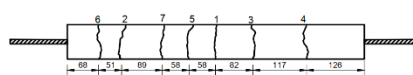

M9-FA-16-(C)

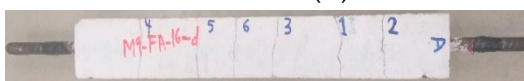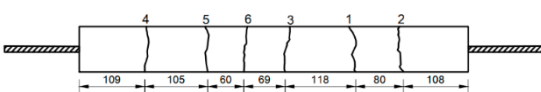

M9-FA-16-(D)

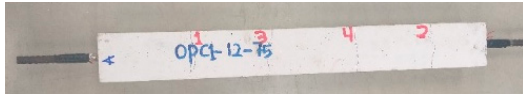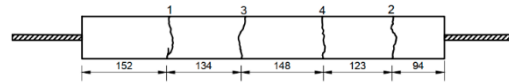

MI-OPC-12-(A)

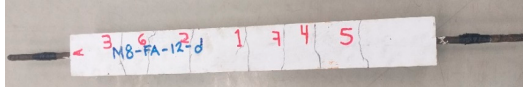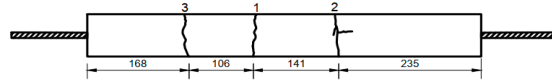

MI-OPC-12-(B)

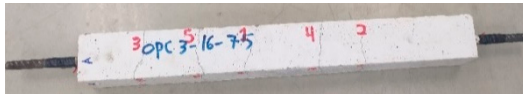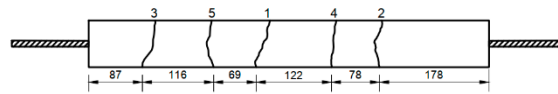

M2-OPC-16-(A)

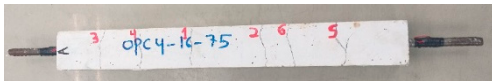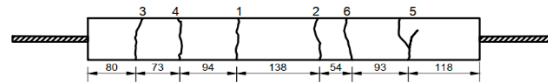

M2-OPC-16-(B)

Figure s1 Final crack pattern of all specimens.

Supplementary S2 Crack widths versus steel stress/yield stress.

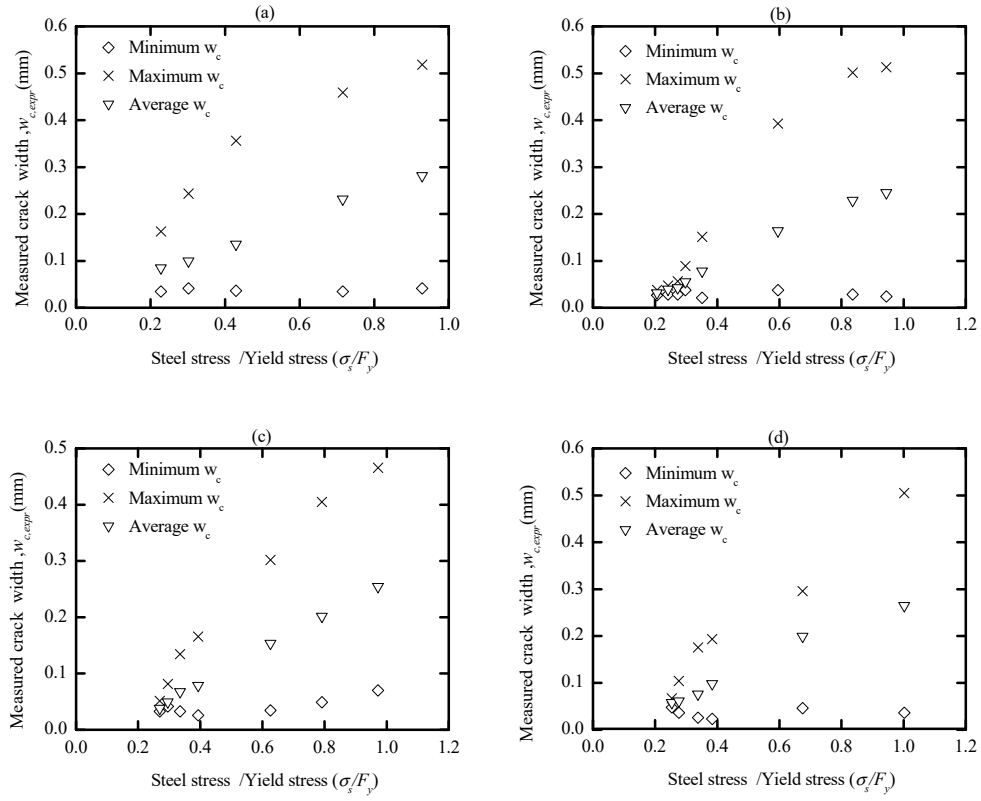

**Figure S2** Crack width vs. steel stress/yield stress (a) M5-FA-10 (A); (b) M5-FA-10 (B); (c) M5-FA-10(C), (d) M5-FA-10(D).

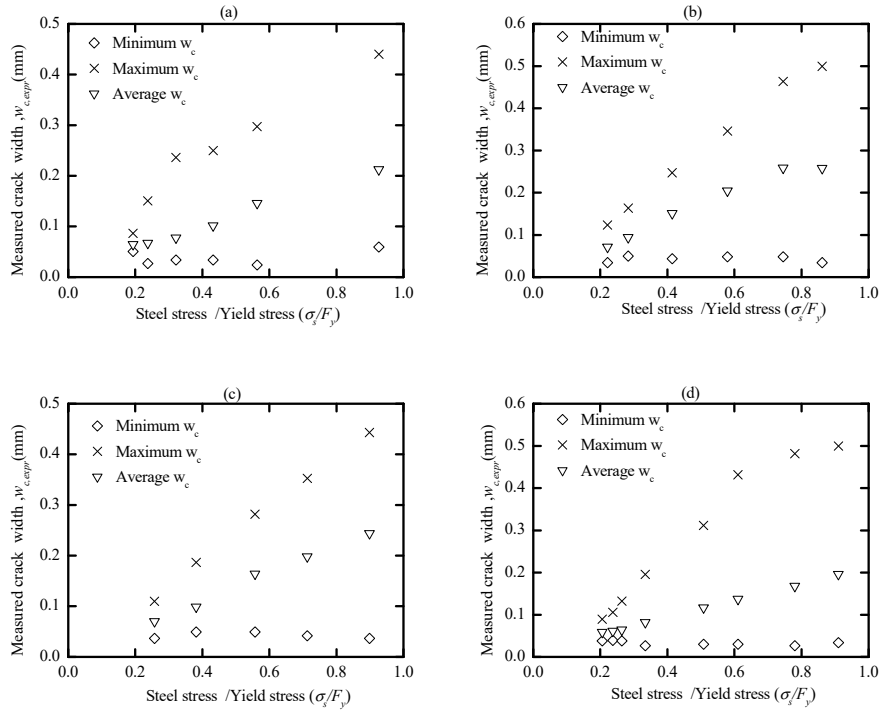

**Figure S3** Crack width vs. steel stress/yield stress (a) M5-FA-12 (A); (b) M5-FA-12 (B); (c) M5-FA-12(C), (d) M5-FA-12(D).

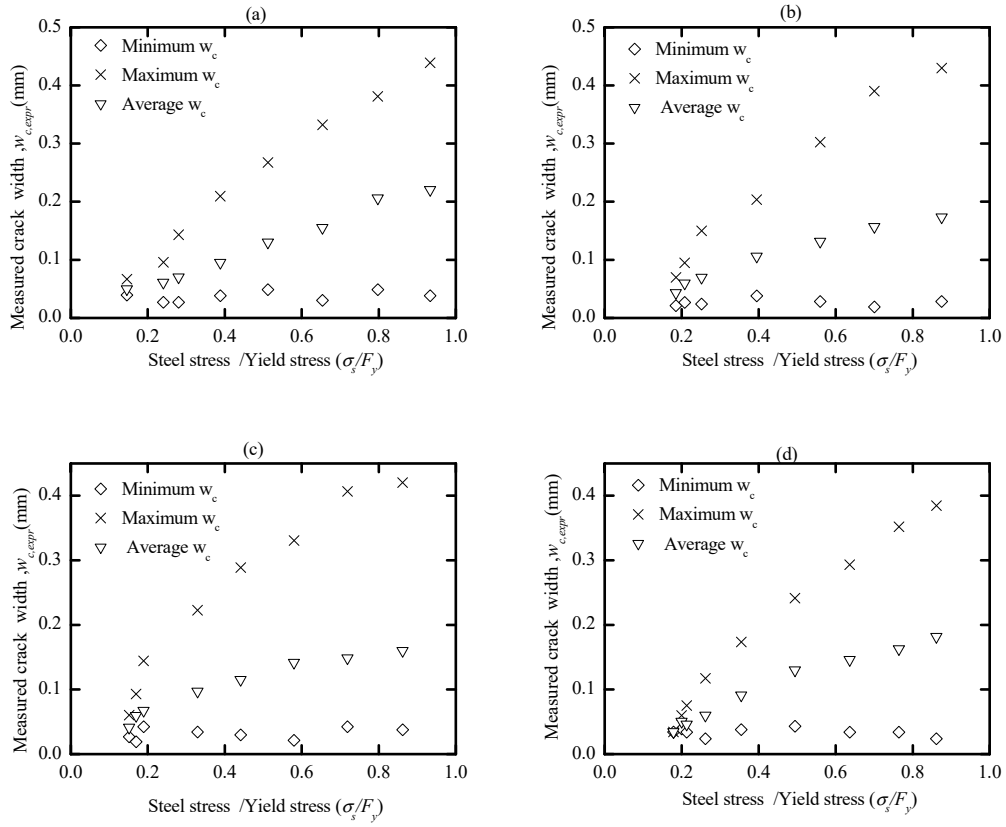

**Figure S4** Crack width vs. steel stress/yield stress (a) M5-FA-16 (A); (b) M5-FA-16 (B); (c) M5-FA-16 (C), (d) M5-FA-16 (D).

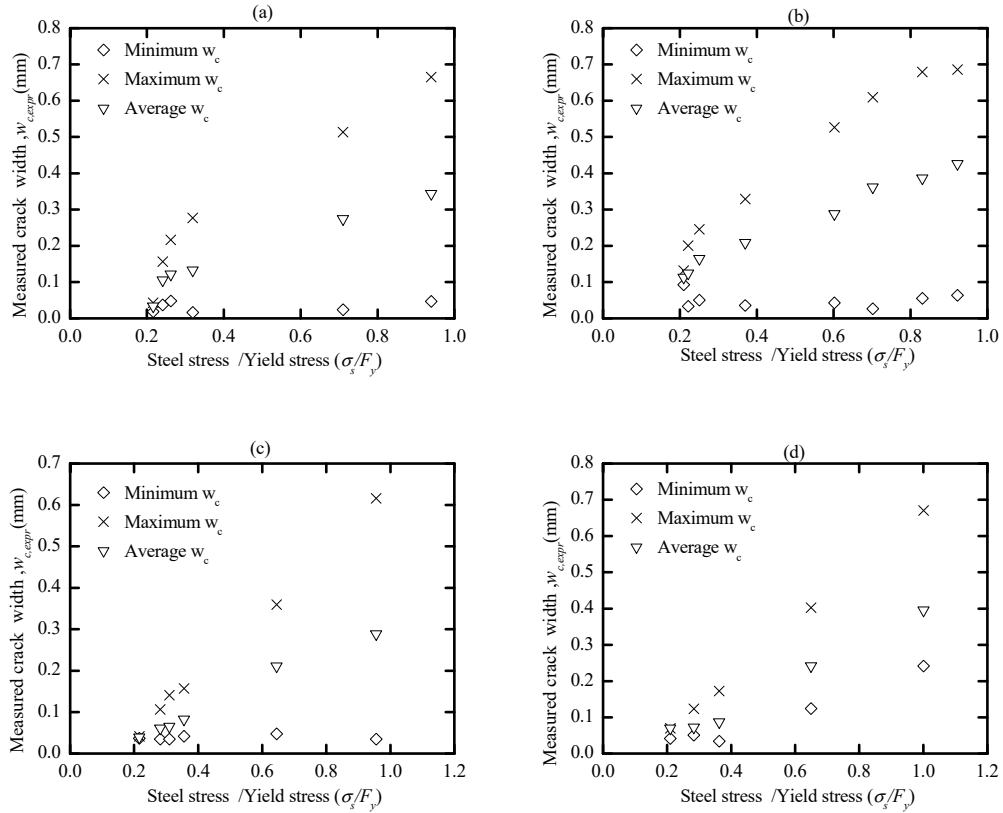

**Figure S5** Crack width vs. steel stress/yield stress (a) M8-FA-10 (A); (b) M8-FA-10 (B); (c) M8-FA-10 (C), (d) M8-FA-10 (D).



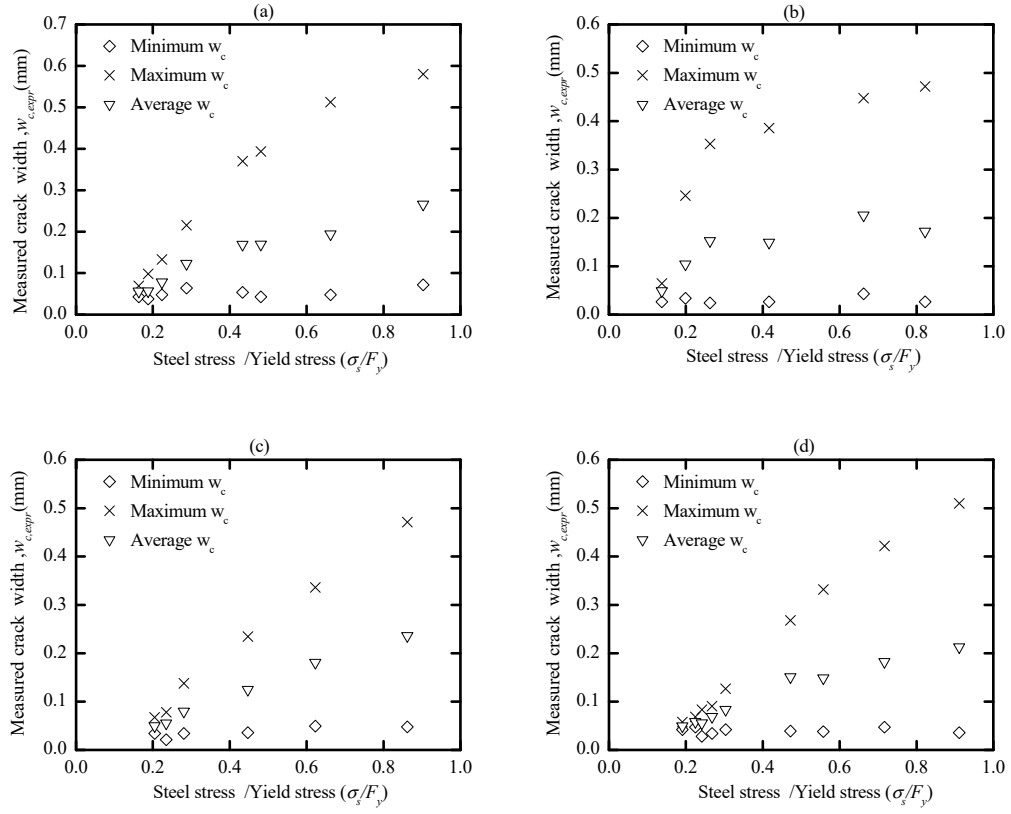

**Figure S6** Crack width vs. steel stress/yield stress (a) M8-FA-12 (A); (b) M8-FA-12 (B); (c) M8-FA-12 (C), (d) M8-FA-12 (D).

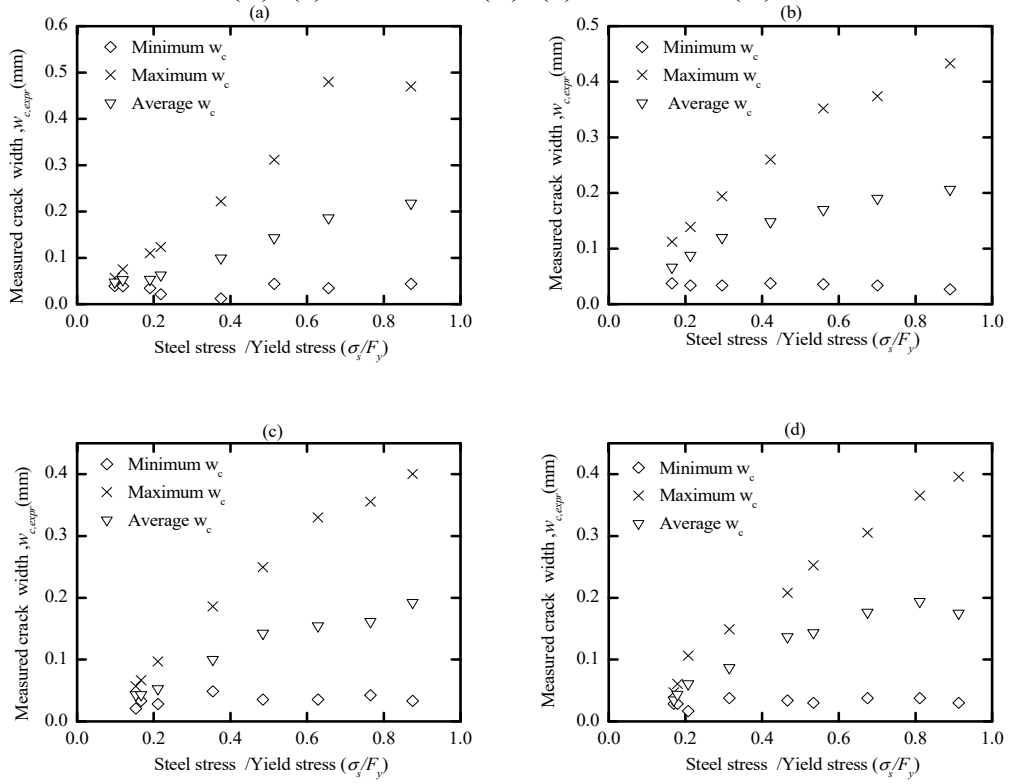

**Figure S7** Crack width vs. steel stress/yield stress (a) M8-FA-16 (A); (b) M8-FA-16 (B); (c) M8-FA-16 (C), (d) M8-FA-16 (D).

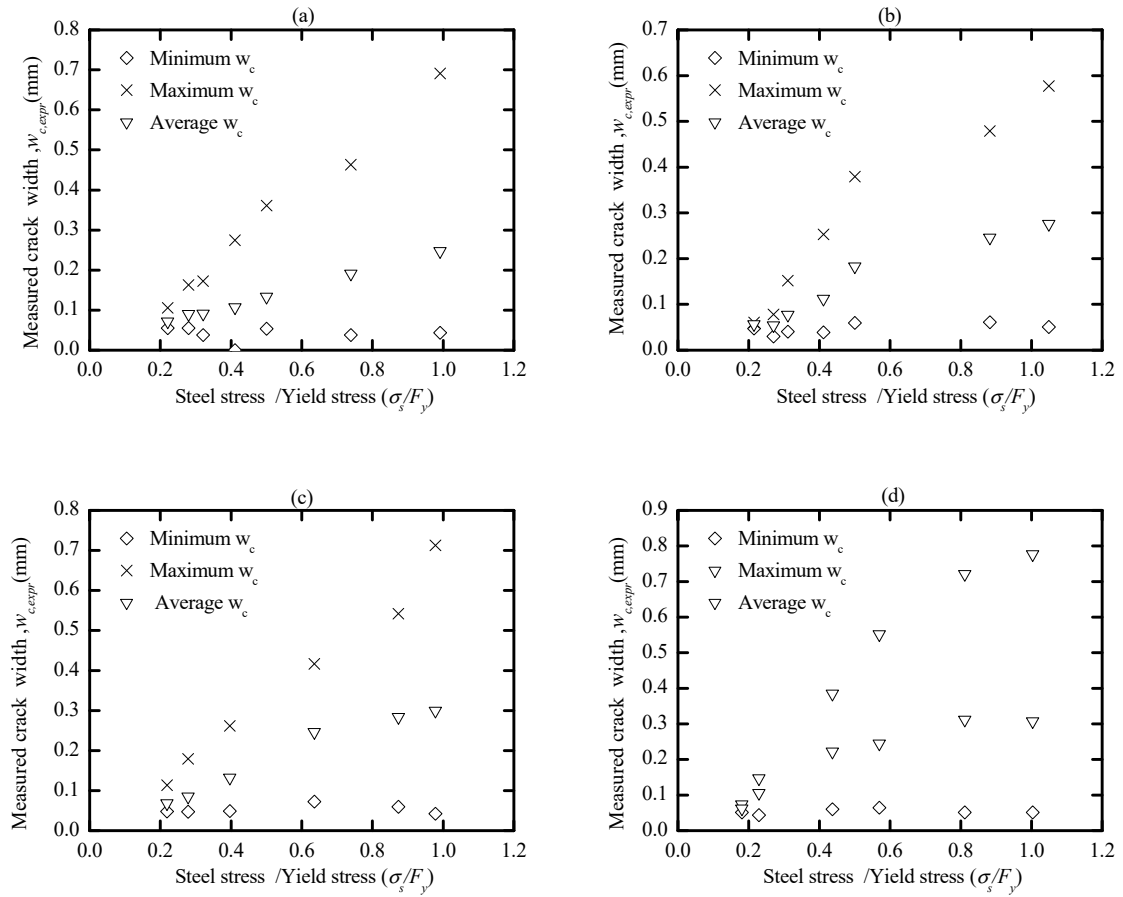

**Figure S8** Crack width vs. steel stress/yield stress (a) M9-FA-10 (A); (b) M9-FA-10 (B); (c) M9-FA-10 (C), (d) M9-FA-10 (D).

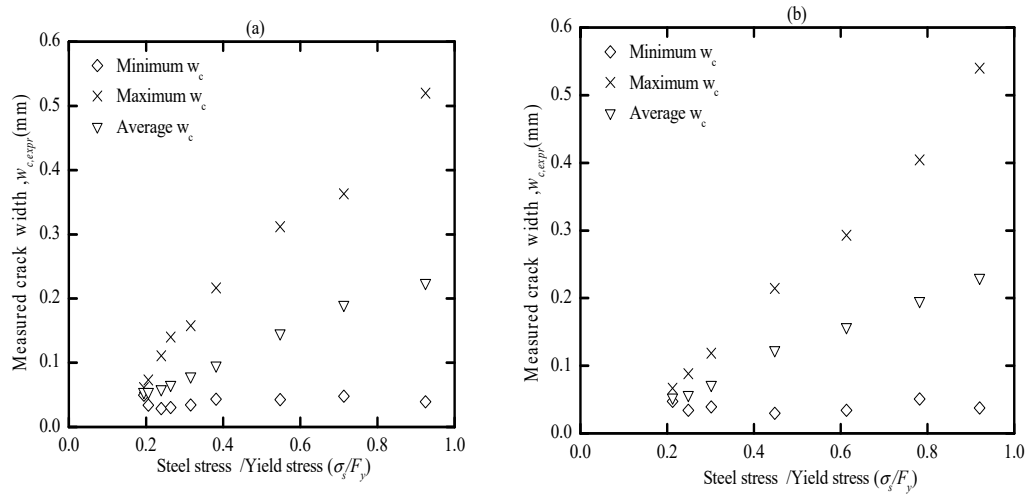

**Figure S9** Crack width vs. steel stress/yield stress (a) M9-FA-12(A); (b) M9-FA-12 (B).

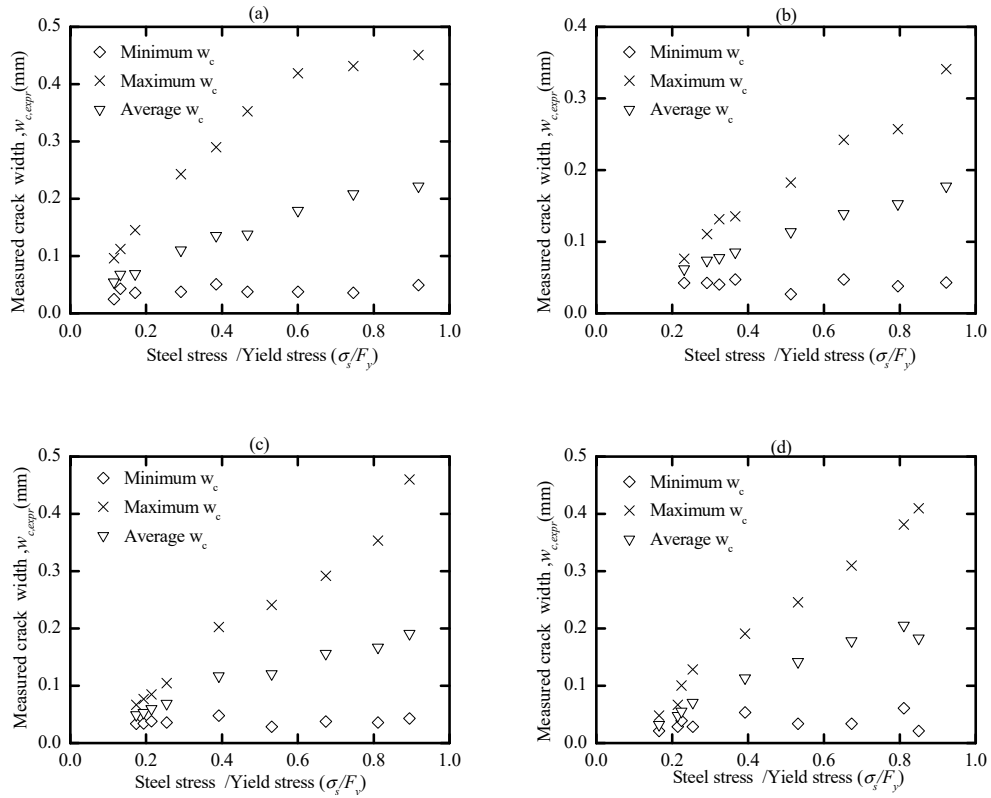

**Figure S10** Crack width vs. steel stress/yield stress (a) M9-FA-16 (A); (b) M9-FA-16 (B); (c) M9-FA-16 (C), (d) M9-FA-16 (D).

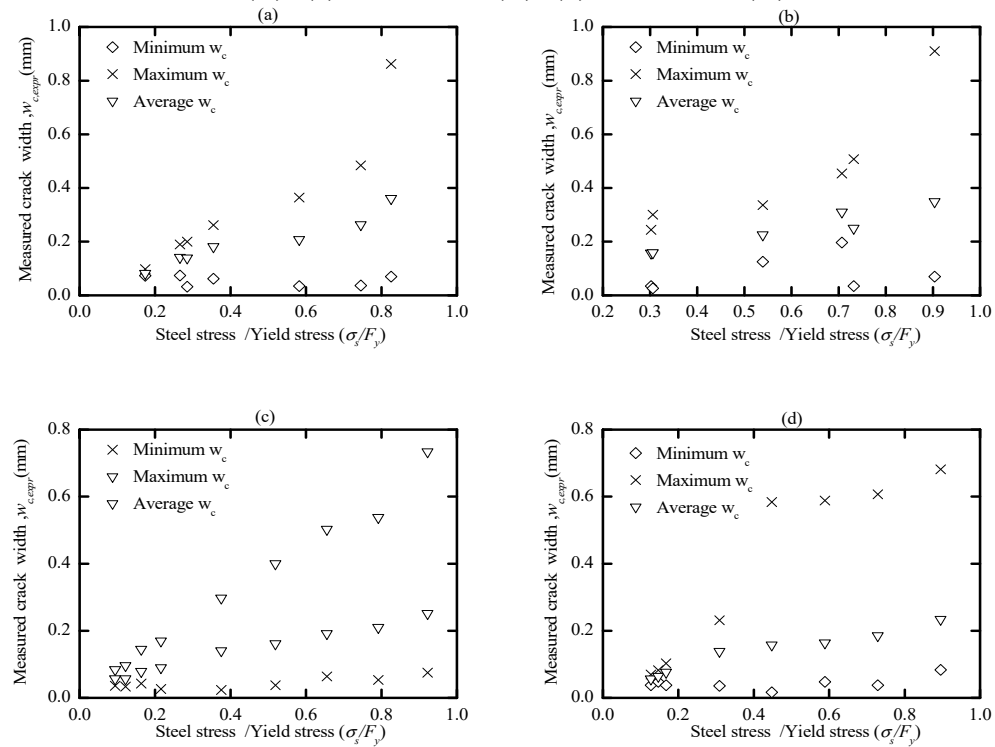

**Figure S11** Crack width vs. steel stress/yield stress (a) M1-OPC-12 (A); (b) M1-OPC-12 (B); (c) M2-OPC-16 (A), (d) M2-OPC-16 (B) .

### Supplementary S3      Cracking results

Table S1      Crack spacing evolution for all specimens up to the stabilized cracking stage

| Specimen ID  | Stage           | F (kN) | $\epsilon_c$ ( $10^{-6}$ ) | $S_{min,expr}$ (mm) | $S_{av,expr}$ (mm) | $S_{max,expr}$ (mm) |
|--------------|-----------------|--------|----------------------------|---------------------|--------------------|---------------------|
| M5-FA-10-(A) | 1 <sup>st</sup> | 9.6    | 279                        | 94                  | 163                | 236                 |
|              | 2 <sup>nd</sup> | 12.7   | 437                        | 94                  | 130                | 164                 |
|              | 3 <sup>rd</sup> | 18.0   | 824                        | 56                  | 108                | 156                 |
| M5-FA-10-(B) | 1 <sup>st</sup> | 8.7    | 189                        | 316                 | 325                | 334                 |
|              | 2 <sup>nd</sup> | 10.1   | 255                        | 121                 | 217                | 316                 |
|              | 3 <sup>rd</sup> | 11.4   | 343                        | 85                  | 163                | 316                 |
|              | 4 <sup>th</sup> | 12.5   | 426                        | 24                  | 108                | 185                 |
|              | 5 <sup>th</sup> | 14.7   | 605                        | 24                  | 93                 | 131                 |
| M5-FA-10-(C) | 1 <sup>st</sup> | 11.3   | 308                        | 138                 | 216                | 342                 |
|              | 2 <sup>nd</sup> | 12.4   | 395                        | 76                  | 162                | 342                 |
|              | 3 <sup>rd</sup> | 14.0   | 509                        | 61                  | 108                | 210                 |
|              | 4 <sup>th</sup> | 16.5   | 679                        | 61                  | 93                 | 132                 |
|              | 5 <sup>th</sup> | 26.3   | 1312                       | 61                  | 93                 | 132                 |
|              | 6 <sup>th</sup> | 33.2   | 1731                       | 59                  | 81                 | 132                 |
| M5-FA-10-(D) | 1 <sup>st</sup> | 10.7   | 239                        | 280                 | 325                | 370                 |
|              | 2 <sup>nd</sup> | 11.6   | 324                        | 181                 | 217                | 280                 |
|              | 3 <sup>rd</sup> | 14.2   | 561                        | 89                  | 108                | 189                 |
|              | 4 <sup>th</sup> | 16.1   | 712                        | 89                  | 93                 | 99                  |
| M5-FA-12-(A) | 1 <sup>st</sup> | 11.7   | 205                        | 309                 | 325                | 341                 |
|              | 2 <sup>nd</sup> | 14.3   | 309                        | 76                  | 130                | 193                 |
|              | 3 <sup>rd</sup> | 19.4   | 531                        | 76                  | 108                | 148                 |
|              | 4 <sup>th</sup> | 26.1   | 859                        | 48                  | 81                 | 122                 |
| M5-FA-12-(B) | 1 <sup>st</sup> | 13.37  | 261                        | 77                  | 163                | 241                 |
|              | 2 <sup>nd</sup> | 17.10  | 477                        | 77                  | 109                | 136                 |
|              | 3 <sup>rd</sup> | 25.03  | 882                        | 77                  | 109                | 136                 |
|              | 4 <sup>th</sup> | 35.00  | 1366                       | 77                  | 109                | 136                 |
|              | 5 <sup>th</sup> | 45.00  | 1830                       | 77                  | 109                | 136                 |
|              | 6 <sup>th</sup> | 52.02  | 2242                       | 63                  | 174                | 107                 |
| M5-FA-12-(C) | 1 <sup>st</sup> | 15.6   | 352                        | 60                  | 109                | 211                 |
|              | 2 <sup>nd</sup> | 23.1   | 719                        | 58                  | 78                 | 103                 |
| M5-FA-12-(D) | 1 <sup>st</sup> | 12.4   | 282                        | 119                 | 163                | 233                 |
|              | 2 <sup>nd</sup> | 14.3   | 355                        | 92                  | 130                | 150                 |
|              | 3 <sup>rd</sup> | 16.0   | 429                        | 64                  | 108                | 150                 |
|              | 4 <sup>th</sup> | 20.2   | 624                        | 45                  | 93                 | 150                 |
|              | 5 <sup>th</sup> | 30.7   | 1155                       | 45                  | 93                 | 150                 |
|              | 6 <sup>th</sup> | 36.9   | 1428                       | 45                  | 81                 | 119                 |
| M5-FA-16-(A) | 1 <sup>st</sup> | 15.7   | 241                        | 234                 | 325                | 416                 |
|              | 2 <sup>nd</sup> | 25.8   | 494                        | 102                 | 163                | 234                 |
|              | 3 <sup>rd</sup> | 30.1   | 595                        | 54                  | 93                 | 171                 |
|              | 4 <sup>th</sup> | 41.7   | 1118                       | 54                  | 81                 | 114                 |
| M5-FA-16-(B) | 1 <sup>st</sup> | 19.8   | 329                        | 187                 | 217                | 274                 |
|              | 2 <sup>nd</sup> | 22.3   | 396                        | 82                  | 130                | 187                 |
|              | 3 <sup>rd</sup> | 27.0   | 525                        | 47                  | 93                 | 130                 |
|              | 4 <sup>th</sup> | 42.4   | 909                        | 47                  | 81                 | 107                 |
| M5-FA-16-(C) | 1 <sup>st</sup> | 16.3   | 264                        | 105                 | 163                | 265                 |
|              | 2 <sup>nd</sup> | 18.2   | 308                        | 86                  | 130                | 179                 |
|              | 3 <sup>rd</sup> | 20.3   | 356                        | 75                  | 108                | 179                 |
|              | 4 <sup>th</sup> | 35.3   | 716                        | 45                  | 93                 | 179                 |
|              | 5 <sup>th</sup> | 47.4   | 1017                       | 31                  | 81                 | 148                 |
|              | 6 <sup>th</sup> | 62.3   | 1350                       | 31                  | 81                 | 148                 |
|              | 7 <sup>th</sup> | 77.2   | 1732                       | 31                  | 72                 | 105                 |
| M5-FA-16-(D) | 1 <sup>st</sup> | 19.2   | 245                        | 306                 | 325                | 344                 |
|              | 2 <sup>nd</sup> | 21.5   | 300                        | 147                 | 217                | 344                 |
|              | 3 <sup>rd</sup> | 22.9   | 339                        | 80                  | 130                | 174                 |
|              | 4 <sup>th</sup> | 28.1   | 469                        | 73                  | 108                | 159                 |
|              | 5 <sup>th</sup> | 38.1   | 715                        | 66                  | 93                 | 147                 |
|              | 6 <sup>th</sup> | 53.1   | 1094                       | 66                  | 93                 | 147                 |
|              | 7 <sup>th</sup> | 68.4   | 1474                       | 54                  | 81                 | 114                 |

| Specimen ID  | Stage           | F (kN) | $\epsilon_c$ ( $10^{-6}$ ) | $S_{min,expr}$ (mm) | $S_{av,expr}$ (mm) | $S_{max,expr}$ (mm) |
|--------------|-----------------|--------|----------------------------|---------------------|--------------------|---------------------|
| M8-FA-10-(A) | 1 <sup>st</sup> | 9.1    | 70                         | 243                 | 325                | 407                 |
|              | 2 <sup>nd</sup> | 10.1   | 104                        | 112                 | 217                | 407                 |
|              | 3 <sup>rd</sup> | 11.0   | 364                        | 112                 | 163                | 233                 |
|              | 4 <sup>th</sup> | 13.4   | 979                        | 71                  | 109                | 131                 |
| M8-FA-10-(B) | 1 <sup>st</sup> | 8.8    | 233                        | 317                 | 325                | 333                 |
|              | 2 <sup>nd</sup> | 9.3    | 365                        | 145                 | 217                | 317                 |
|              | 3 <sup>rd</sup> | 10.5   | 516                        | 129                 | 163                | 188                 |
|              | 4 <sup>th</sup> | 15.5   | 923                        | 79                  | 108                | 145                 |
| M8-FA-10-(C) | 1 <sup>st</sup> | 9.1    | 199                        | 323                 | 325                | 327                 |
|              | 2 <sup>nd</sup> | 11.8   | 349                        | 116                 | 162                | 206                 |
|              | 3 <sup>rd</sup> | 13.0   | 436                        | 56                  | 125                | 184                 |
|              | 4 <sup>th</sup> | 14.9   | 609                        | 52                  | 93                 | 135                 |
| M8-FA-10-(D) | 1 <sup>st</sup> | 8.8    | 198                        | 246                 | 325                | 404                 |
|              | 2 <sup>nd</sup> | 11.9   | 419                        | 76                  | 109                | 140                 |
|              | 3 <sup>rd</sup> | 15.2   | 689                        | 60                  | 93                 | 140                 |
| M8-FA-12-(A) | 1 <sup>st</sup> | 9.9    | 232                        | 134                 | 325                | 516                 |
|              | 2 <sup>nd</sup> | 11.3   | 295                        | 129                 | 217                | 387                 |
|              | 3 <sup>rd</sup> | 13.5   | 420                        | 129                 | 163                | 248                 |
|              | 4 <sup>th</sup> | 17.4   | 634                        | 94                  | 130                | 154                 |
|              | 5 <sup>th</sup> | 26.2   | 1140                       | 67                  | 108                | 139                 |
|              | 6 <sup>th</sup> | 29.1   | 1298                       | 53                  | 93                 | 134                 |
| M8-FA-12-(B) | 1 <sup>st</sup> | 8.3    | 88                         | 200                 | 325                | 450                 |
|              | 2 <sup>nd</sup> | 12.0   | 292                        | 135                 | 163                | 200                 |
|              | 3 <sup>rd</sup> | 15.9   | 651                        | 74                  | 130                | 158                 |
|              | 4 <sup>th</sup> | 25.1   | 1169                       | 57                  | 81                 | 126                 |
| M8-FA-12-(C) | 1 <sup>st</sup> | 12.3   | 261                        | 186                 | 217                | 234                 |
|              | 2 <sup>nd</sup> | 14.2   | 329                        | 84                  | 130                | 234                 |
|              | 3 <sup>rd</sup> | 17.0   | 443                        | 56                  | 93                 | 127                 |
| M8-FA-12-(D) | 1 <sup>st</sup> | 11.5   | 250                        | 314                 | 325                | 336                 |
|              | 2 <sup>nd</sup> | 13.6   | 330                        | 103                 | 217                | 336                 |
|              | 3 <sup>rd</sup> | 14.6   | 381                        | 97                  | 163                | 336                 |
|              | 4 <sup>th</sup> | 16.2   | 451                        | 97                  | 130                | 209                 |
|              | 5 <sup>th</sup> | 18.3   | 553                        | 86                  | 108                | 127                 |
|              | 6 <sup>th</sup> | 28.5   | 1038                       | 86                  | 108                | 127                 |
|              | 7 <sup>th</sup> | 33.7   | 1322                       | 37                  | 81                 | 123                 |
| M8-FA-16-(A) | 1 <sup>st</sup> | 10.6   | 123                        | 231                 | 325                | 419                 |
|              | 2 <sup>nd</sup> | 12.8   | 168                        | 179                 | 217                | 240                 |
|              | 3 <sup>rd</sup> | 20.5   | 328                        | 43                  | 130                | 240                 |
|              | 4 <sup>th</sup> | 23.5   | 453                        | 43                  | 93                 | 130                 |
| M8-FA-16-(B) | 1 <sup>st</sup> | 17.7   | 298                        | 115                 | 162                | 199                 |
|              | 2 <sup>nd</sup> | 22.9   | 424                        | 98                  | 130                | 199                 |
|              | 3 <sup>rd</sup> | 31.7   | 665                        | 89                  | 108                | 137                 |
|              | 4 <sup>th</sup> | 45.3   | 988                        | 29                  | 93                 | 137                 |
| M8-FA-16-(C) | 1 <sup>st</sup> | 16.5   | 171                        | 81                  | 163                | 305                 |
|              | 2 <sup>nd</sup> | 17.9   | 189                        | 81                  | 130                | 208                 |
|              | 3 <sup>rd</sup> | 22.7   | 263                        | 79                  | 93                 | 111                 |
| M8-FA-16-(D) | 1 <sup>st</sup> | 18.2   | 235                        | 285                 | 325                | 365                 |
|              | 2 <sup>nd</sup> | 19.3   | 267                        | 97                  | 130                | 160                 |
|              | 3 <sup>rd</sup> | 22.3   | 328                        | 61                  | 108                | 160                 |
|              | 4 <sup>th</sup> | 33.8   | 575                        | 61                  | 93                 | 136                 |
|              | 5 <sup>th</sup> | 50.1   | 942                        | 61                  | 93                 | 136                 |
|              | 6 <sup>th</sup> | 57.3   | 1107                       | 51                  | 81                 | 136                 |
| M9-FA-10-(A) | 1 <sup>st</sup> | 9.3    | 345                        | 106                 | 226                | 319                 |
|              | 2 <sup>nd</sup> | 11.7   | 540                        | 106                 | 169                | 252                 |
|              | 3 <sup>rd</sup> | 13.5   | 697                        | 72                  | 130                | 180                 |
|              | 4 <sup>th</sup> | 17.2   | 1024                       | 69                  | 108                | 180                 |
|              | 5 <sup>th</sup> | 21.0   | 1331                       | 69                  | 93                 | 139                 |
| M9-FA-10-(B) | 1 <sup>st</sup> | 9.0    | 292                        | 155                 | 325                | 495                 |
|              | 2 <sup>nd</sup> | 11.3   | 425                        | 151                 | 217                | 344                 |
|              | 3 <sup>rd</sup> | 13.0   | 528                        | 49                  | 108                | 274                 |
|              | 4 <sup>th</sup> | 17.3   | 833                        | 49                  | 81                 | 156                 |
| M9-FA-10-(C) | 1 <sup>st</sup> | 9.2    | 353                        | 94                  | 163                | 247                 |
|              | 2 <sup>nd</sup> | 11.7   | 569                        | 36                  | 108                | 147                 |
|              | 3 <sup>rd</sup> | 16.6   | 1036                       | 36                  | 93                 | 147                 |

| Specimen ID   | Stage           | F (kN) | $\epsilon_c$ ( $10^{-6}$ ) | $S_{min,expr}$ (mm) | $S_{av,expr}$ (mm) | $S_{max,expr}$ (mm) |
|---------------|-----------------|--------|----------------------------|---------------------|--------------------|---------------------|
| M9-FA-10-(D)  | 1 <sup>st</sup> | 7.6    | 166                        | 170                 | 217                | 264                 |
|               | 2 <sup>nd</sup> | 9.6    | 287                        | 98                  | 163                | 216                 |
|               | 3 <sup>rd</sup> | 18.3   | 799                        | 98                  | 130                | 170                 |
|               | 4 <sup>th</sup> | 23.9   | 1162                       | 67                  | 93                 | 111                 |
| M9-FA-12-(A)  | 1 <sup>st</sup> | 11.8   | 270                        | 150                 | 325                | 500                 |
|               | 2 <sup>nd</sup> | 12.4   | 309                        | 150                 | 217                | 343                 |
|               | 3 <sup>rd</sup> | 14.5   | 418                        | 66                  | 130                | 243                 |
|               | 4 <sup>th</sup> | 15.9   | 486                        | 66                  | 108                | 150                 |
|               | 5 <sup>th</sup> | 19.1   | 619                        | 64                  | 93                 | 150                 |
|               | 6 <sup>th</sup> | 23.1   | 807                        | 55                  | 81                 | 102                 |
| M9-FA-12-(B)  | 1 <sup>st</sup> | 12.8   | 343                        | 80                  | 162                | 242                 |
|               | 2 <sup>nd</sup> | 15.0   | 434                        | 80                  | 130                | 197                 |
|               | 3 <sup>rd</sup> | 18.2   | 572                        | 53                  | 93                 | 130                 |
| M9-FA-16-(A)  | 1 <sup>st</sup> | 12.4   | 164                        | 247                 | 325                | 403                 |
|               | 2 <sup>nd</sup> | 14.2   | 169                        | 95                  | 217                | 403                 |
|               | 3 <sup>rd</sup> | 18.4   | 279                        | 86                  | 130                | 187                 |
|               | 4 <sup>th</sup> | 31.3   | 543                        | 86                  | 108                | 152                 |
|               | 5 <sup>th</sup> | 41.3   | 770                        | 39                  | 93                 | 152                 |
|               | 6 <sup>th</sup> | 50.2   | 962                        | 39                  | 81                 | 95                  |
| M9-FA-16-(B)  | 1 <sup>st</sup> | 24.9   | 505                        | 147                 | 325                | 503                 |
|               | 2 <sup>nd</sup> | 31.3   | 672                        | 71                  | 108                | 147                 |
|               | 3 <sup>rd</sup> | 34.8   | 756                        | 46                  | 93                 | 147                 |
|               | 4 <sup>th</sup> | 39.3   | 868                        | 43                  | 81                 | 147                 |
|               | 5 <sup>th</sup> | 55.0   | 1269                       | 43                  | 72                 | 108                 |
| M9-FA-16-(C)  | 1 <sup>st</sup> | 18.7   | 315                        | 119                 | 217                | 326                 |
|               | 2 <sup>nd</sup> | 20.8   | 379                        | 83                  | 163                | 243                 |
|               | 3 <sup>rd</sup> | 23.0   | 426                        | 83                  | 130                | 205                 |
|               | 4 <sup>th</sup> | 27.3   | 519                        | 58                  | 108                | 147                 |
|               | 5 <sup>th</sup> | 42.1   | 843                        | 58                  | 108                | 147                 |
|               | 6 <sup>th</sup> | 57.0   | 1185                       | 51                  | 81                 | 126                 |
| M9-FA-16-(C)  | 1 <sup>st</sup> | 17.8   | 203                        | 80                  | 217                | 462                 |
|               | 2 <sup>nd</sup> | 23.0   | 326                        | 80                  | 163                | 344                 |
|               | 3 <sup>rd</sup> | 24.1   | 316                        | 80                  | 108                | 130                 |
|               | 4 <sup>th</sup> | 27.3   | 445                        | 60                  | 93                 | 118                 |
| M1-OPC-12 (A) | 1 <sup>st</sup> | 10.5   | 104                        | 152                 | 325                | 498                 |
|               | 2 <sup>nd</sup> | 16.1   | 324                        | 94                  | 217                | 404                 |
|               | 3 <sup>rd</sup> | 17.2   | 522                        | 94                  | 163                | 270                 |
|               | 4 <sup>th</sup> | 21.4   | 870                        | 94                  | 130                | 152                 |
| M1-OPC-12 (B) | 1 <sup>st</sup> | 18.3   | 292                        | 274                 | 325                | 376                 |
|               | 2 <sup>nd</sup> | 18.5   | 510                        | 141                 | 217                | 274                 |
|               | 3 <sup>rd</sup> | 32.6   | 905                        | 141                 | 217                | 274                 |
|               | 4 <sup>th</sup> | 42.7   | 1225                       | 141                 | 217                | 274                 |
|               | 5 <sup>th</sup> | 44.2   | 1469                       | 106                 | 163                | 235                 |
| M2-OPC-16 (A) | 1 <sup>st</sup> | 10.1   | 174                        | 178                 | 217                | 272                 |
|               | 2 <sup>nd</sup> | 13.0   | 200                        | 87                  | 163                | 200                 |
|               | 3 <sup>rd</sup> | 17.5   | 315                        | 78                  | 130                | 185                 |
|               | 4 <sup>th</sup> | 23.2   | 462                        | 69                  | 108                | 178                 |
| M2-OPC-16 (B) | 1 <sup>st</sup> | 13.7   | 155                        | 138                 | 217                | 265                 |
|               | 2 <sup>nd</sup> | 15.8   | 272                        | 80                  | 163                | 265                 |
|               | 3 <sup>rd</sup> | 18.0   | 372                        | 73                  | 108                | 147                 |
|               | 4 <sup>th</sup> | 33.2   | 716                        | 73                  | 108                | 147                 |
|               | 5 <sup>th</sup> | 48.1   | 1118                       | 73                  | 108                | 147                 |
|               | 6 <sup>th</sup> | 63.2   | 1515                       | 54                  | 93                 | 138                 |

Table S2 Comparison between the experimental and predicted average and maximum crack spacing of all specimens.

| Reference     | Specimen ID.  | Average crack spacing (mm) |              |              |              | $S_{max,exp}$ | Maximum crack spacing (mm) |                  |                  |
|---------------|---------------|----------------------------|--------------|--------------|--------------|---------------|----------------------------|------------------|------------------|
|               |               | $S_{av,exp}$               | $S_{pred}^a$ | $S_{pred}^b$ | $S_{pred}^c$ |               | $S_{max,pred}^a$           | $S_{max,pred}^b$ | $S_{max,pred}^d$ |
| Present study | M5-FA-10-(A)  | 108                        | 65           | 131          | 97           | 156           | 111                        | 196              | 136              |
|               | M5-FA-10-(B)  | 93                         | 65           | 131          | 97           | 131           | 111                        | 196              | 136              |
|               | M5-FA-10-(C)  | 81                         | 65           | 131          | 97           | 132           | 111                        | 196              | 136              |
|               | M5-FA-10-(D)  | 93                         | 65           | 131          | 97           | 99            | 111                        | 196              | 136              |
|               | M5-FA-12-(A)  | 81                         | 63           | 108          | 90           | 122           | 107                        | 162              | 128              |
|               | M5-FA-12-(B)  | 93                         | 63           | 108          | 90           | 135           | 107                        | 162              | 128              |
|               | M5-FA-12-(C)  | 94                         | 63           | 108          | 90           | 135           | 107                        | 162              | 128              |
|               | M5-FA-12-(D)  | 81                         | 63           | 108          | 90           | 119           | 107                        | 162              | 128              |
|               | M5-FA-16-(A)  | 81                         | 59           | 80           | 79           | 114           | 100                        | 120              | 116              |
|               | M5-FA-16-(B)  | 81                         | 59           | 80           | 79           | 107           | 100                        | 120              | 116              |
|               | M5-FA-16-(C)  | 72                         | 59           | 80           | 79           | 105           | 100                        | 120              | 116              |
|               | M5-FA-16-(D)  | 81                         | 59           | 80           | 79           | 101           | 100                        | 120              | 116              |
|               | M8-FA-10-(A)  | 109                        | 65           | 131          | 97           | 131           | 111                        | 196              | 136              |
|               | M8-FA-10-(B)  | 108                        | 65           | 131          | 97           | 145           | 111                        | 196              | 136              |
|               | M8-FA-10-(C)  | 93                         | 65           | 131          | 97           | 135           | 111                        | 196              | 136              |
|               | M8-FA-10-(D)  | 93                         | 65           | 131          | 97           | 140           | 111                        | 196              | 136              |
|               | M8-FA-12-(A)  | 93                         | 63           | 108          | 90           | 134           | 107                        | 162              | 128              |
|               | M8-FA-12-(B)  | 81                         | 63           | 108          | 90           | 126           | 107                        | 162              | 128              |
|               | M8-FA-12-(C)  | 93                         | 63           | 108          | 90           | 127           | 107                        | 162              | 128              |
|               | M8-FA-12-(D)  | 81                         | 63           | 108          | 90           | 123           | 107                        | 162              | 128              |
|               | M8-FA-16-(A)  | 93                         | 59           | 80           | 79           | 130           | 100                        | 120              | 116              |
|               | M8-FA-16-(B)  | 93                         | 59           | 80           | 79           | 137           | 100                        | 120              | 116              |
|               | M8-FA-16-(C)  | 93                         | 59           | 80           | 79           | 111           | 100                        | 120              | 116              |
|               | M8-FA-16-(D)  | 81                         | 59           | 80           | 79           | 136           | 100                        | 120              | 116              |
|               | M9-FA-10-(A)  | 93                         | 65           | 131          | 97           | 139           | 111                        | 196              | 136              |
|               | M9-FA-10-(B)  | 81                         | 65           | 131          | 97           | 156           | 111                        | 196              | 136              |
|               | M9-FA-10-(C)  | 93                         | 65           | 131          | 97           | 147           | 111                        | 196              | 136              |
|               | M9-FA-10-(D)  | 93                         | 65           | 131          | 97           | 111           | 111                        | 196              | 136              |
|               | M9-FA-12-(A)  | 81                         | 63           | 108          | 90           | 102           | 107                        | 162              | 128              |
|               | M9-FA-12-(C)  | 93                         | 63           | 108          | 90           | 130           | 107                        | 162              | 128              |
|               | M9-FA-16-(A)  | 81                         | 59           | 80           | 79           | 95            | 100                        | 120              | 116              |
|               | M9-FA-16-(B)  | 72                         | 59           | 80           | 79           | 108           | 100                        | 120              | 116              |
|               | M9-FA-16-(C)  | 81                         | 59           | 80           | 79           | 126           | 100                        | 120              | 116              |
|               | M9-FA-16-(D)  | 93                         | 59           | 80           | 79           | 118           | 100                        | 120              | 116              |
|               | M1-OPC-12-(A) | 130                        | 63           | 108          | -            | 152           | 107                        | 162              | -                |
|               | M1-OPC-12-(B) | 163                        | 63           | 108          | -            | 235           | 107                        | 162              | -                |
|               | M1-OPC-16-(A) | 108                        | 59           | 80           | -            | 178           | 100                        | 120              | -                |
|               | M1-OPC-16-(B) | 93                         | 59           | 80           | -            | 138           | 100                        | 120              | -                |
| Albitar       | FA 1-12-75    | 108                        | 63           | 108          | 90           | 140           | 107                        | 162              | 128              |
|               | FA 2-12-75    | 93                         | 63           | 108          | 90           | 135           | 107                        | 162              | 128              |
|               | FA 3-16-75    | 81                         | 59           | 80           | 79           | 140           | 100                        | 120              | 116              |
|               | FA 4-16-75    | 93                         | 59           | 80           | 79           | 130           | 100                        | 120              | 116              |

**Notation:** <sup>a</sup> predicted value according to Eurocode 2, <sup>b</sup> predicted value according to CEB-FIP 1990, <sup>c</sup> predicted value according to proposed model (Table 7), <sup>d</sup> predicted value according to proposed model.

Table S3 Comparison between the experimental and predicted maximum crack width of all specimens.

| Reference     | Specimen ID | Maximum crack width |                    |                    |                     |                     |
|---------------|-------------|---------------------|--------------------|--------------------|---------------------|---------------------|
|               |             | $W_{Av,exp}$        | $W^a_{Av,predict}$ | $W^b_{Av,predict}$ | $W^c_{Max,predict}$ | $W^d_{Max,predict}$ |
| Present study | M5-FA-10-A  | 0.52                | 0.49               | 0.38               | 0.43                | 0.52                |
|               | M5-FA-10-B  | 0.51                | 0.41               | 0.42               | 0.46                | 0.56                |
|               | M5-FA-10-C  | 0.47                | 0.42               | 0.39               | 0.43                | 0.53                |
|               | M5-FA-10-D  | 0.50                | 0.31               | 0.40               | 0.45                | 0.54                |
|               | M5-FA-12-A  | 0.44                | 0.28               | 0.34               | 0.42                | 0.52                |
|               | M5-FA-12-B  | 0.50                | 0.31               | 0.33               | 0.41                | 0.50                |
|               | M5-FA-12-C  | 0.44                | 0.31               | 0.33               | 0.41                | 0.50                |
|               | M5-FA-12-D  | 0.50                | 0.27               | 0.33               | 0.41                | 0.50                |
|               | M5-FA-16-A  | 0.44                | 0.25               | 0.27               | 0.42                | 0.52                |
|               | M5-FA-16-B  | 0.43                | 0.24               | 0.24               | 0.38                | 0.46                |
|               | M5-FA-16-C  | 0.42                | 0.23               | 0.25               | 0.40                | 0.49                |
|               | M5-FA-16-D  | 0.38                | 0.22               | 0.25               | 0.39                | 0.48                |
|               | M8-FA-10-A  | 0.67                | 0.42               | 0.40               | 0.44                | 0.54                |
|               | M8-FA-10-B  | 0.69                | 0.46               | 0.38               | 0.42                | 0.52                |
|               | M8-FA-10-C  | 0.62                | 0.43               | 0.40               | 0.44                | 0.53                |
|               | M8-FA-10-D  | 0.67                | 0.45               | 0.42               | 0.46                | 0.56                |
|               | M8-FA-12-A  | 0.58                | 0.31               | 0.30               | 0.38                | 0.46                |
|               | M8-FA-12-B  | 0.47                | 0.29               | 0.33               | 0.41                | 0.50                |
|               | M8-FA-12-C  | 0.47                | 0.29               | 0.31               | 0.39                | 0.48                |
|               | M8-FA-12-D  | 0.51                | 0.29               | 0.34               | 0.42                | 0.51                |
|               | M8-FA-16-A  | 0.48                | 0.29               | 0.25               | 0.39                | 0.48                |
|               | M8-FA-16-B  | 0.43                | 0.31               | 0.26               | 0.40                | 0.48                |
|               | M8-FA-16-C  | 0.40                | 0.25               | 0.26               | 0.40                | 0.49                |
|               | M8-FA-16-D  | 0.40                | 0.31               | 0.27               | 0.41                | 0.50                |
|               | M9-FA-10-A  | 0.69                | 0.45               | 0.43               | 0.45                | 0.55                |
|               | M9-FA-10-B  | 0.58                | 0.51               | 0.44               | 0.48                | 0.58                |
|               | M9-FA-10-C  | 0.71                | 0.48               | 0.42               | 0.45                | 0.54                |
|               | M9-FA-10-D  | 0.78                | 0.36               | 0.44               | 0.46                | 0.56                |
|               | M9-FA-12-C  | 0.52                | 0.24               | 0.35               | 0.42                | 0.51                |
|               | M9-FA-12-D  | 0.54                | 0.31               | 0.35               | 0.42                | 0.51                |
|               | M9-FA-16-A  | 0.45                | 0.22               | 0.26               | 0.40                | 0.49                |
|               | M9-FA-16-B  | 0.34                | 0.25               | 0.27               | 0.42                | 0.51                |
|               | M9-FA-16-C  | 0.46                | 0.29               | 0.27               | 0.41                | 0.50                |
|               | M9-FA-16-D  | 0.41                | 0.27               | 0.26               | 0.39                | 0.48                |

**Notation:** <sup>a</sup> predicted value according to Eurocode 2, <sup>b</sup> predicted value according to CEB-FIP 1990, <sup>c</sup> predicted value according to ACI 224, <sup>d</sup> predicted value according to proposal model.



Table S4 Crack widths at different loading stages

| Spec. ID.    | Sta. NO. | P (kN) | $(\sigma/F_y)$ | 1 <sup>st</sup> crack |      |      | 2 <sup>nd</sup> crack |      |      | 3 <sup>rd</sup> crack |      |      | 4 <sup>th</sup> crack |      |      | 5 <sup>th</sup> crack |      |      | 6 <sup>th</sup> crack |      |      | 7 <sup>th</sup> crack |      |      | 8 <sup>th</sup> crack |      |      | Min. crack width | Max. crack width | Ave. crack width |
|--------------|----------|--------|----------------|-----------------------|------|------|-----------------------|------|------|-----------------------|------|------|-----------------------|------|------|-----------------------|------|------|-----------------------|------|------|-----------------------|------|------|-----------------------|------|------|------------------|------------------|------------------|
|              |          |        |                | Min.                  | Max. | Ave. | Min.             | Max.             | Ave.             |
| M5-FA-10-(A) | 1st      | 9.4    | 0.22           | 0.06                  | 0.16 | 0.12 | 0.05                  | 0.08 | 0.07 | 0.03                  | 0.09 | 0.07 | -                     | -    | -    | -                     | -    | -    | -                     | -    | -    | -                     | -    | -    | -                     | -    | -    | 0.03             | 0.16             | 0.08             |
|              | 2nd      | 12.7   | 0.30           | 0.06                  | 0.24 | 0.15 | 0.04                  | 0.09 | 0.07 | 0.06                  | 0.17 | 0.11 | 0.06                  | 0.07 | 0.06 | -                     | -    | -    | -                     | -    | -    | -                     | -    | -    | -                     | -    | -    | 0.04             | 0.24             | 0.10             |
|              | 3rd      | 18.0   | 0.43           | 0.07                  | 0.36 | 0.16 | 0.10                  | 0.16 | 0.13 | 0.11                  | 0.22 | 0.17 | 0.06                  | 0.22 | 0.15 | 0.04                  | 0.10 | 0.07 | -                     | -    | -    | -                     | -    | -    | -                     | -    | -    | 0.04             | 0.36             | 0.14             |
|              | 4th      | 30.0   | 0.72           | 0.04                  | 0.44 | 0.21 | 0.03                  | 0.35 | 0.18 | 0.16                  | 0.39 | 0.29 | 0.11                  | 0.46 | 0.31 | 0.09                  | 0.26 | 0.18 | -                     | -    | -    | -                     | -    | -    | -                     | -    | -    | 0.03             | 0.46             | 0.23             |
|              | 5th      | 38.9   | 0.93           | 0.06                  | 0.45 | 0.24 | 0.04                  | 0.44 | 0.24 | 0.12                  | 0.48 | 0.35 | 0.06                  | 0.52 | 0.35 | 0.07                  | 0.38 | 0.22 | -                     | -    | -    | -                     | -    | -    | -                     | -    | -    | 0.04             | 0.52             | 0.28             |
| M5-FA-10-(B) | 1st      | 8.7    | 0.21           | 0.03                  | 0.04 | 0.03 | -                     | -    | -    | -                     | -    | -    | -                     | -    | -    | -                     | -    | -    | -                     | -    | -    | -                     | -    | -    | -                     | -    | -    | 0.03             | 0.04             | 0.03             |
|              | 2nd      | 10.1   | 0.24           | 0.03                  | 0.05 | 0.04 | 0.04                  | 0.04 | 0.04 | -                     | -    | -    | -                     | -    | -    | -                     | -    | -    | -                     | -    | -    | -                     | -    | -    | -                     | -    | -    | 0.03             | 0.05             | 0.04             |
|              | 3rd      | 11.4   | 0.27           | 0.03                  | 0.06 | 0.04 | 0.05                  | 0.05 | 0.05 | 0.03                  | 0.04 | 0.03 | -                     | -    | -    | -                     | -    | -    | -                     | -    | -    | -                     | -    | -    | -                     | -    | -    | 0.03             | 0.06             | 0.04             |
|              | 4th      | 12.5   | 0.30           | 0.04                  | 0.07 | 0.06 | 0.04                  | 0.06 | 0.05 | 0.04                  | 0.05 | 0.04 | 0.05                  | 0.09 | 0.07 | 0.05                  | 0.06 | 0.06 | -                     | -    | -    | -                     | -    | -    | -                     | -    | -    | 0.04             | 0.09             | 0.06             |
|              | 5th      | 14.7   | 0.35           | 0.03                  | 0.10 | 0.05 | 0.02                  | 0.07 | 0.05 | 0.06                  | 0.10 | 0.08 | 0.10                  | 0.15 | 0.14 | 0.06                  | 0.09 | 0.07 | 0.05                  | 0.12 | 0.08 | -                     | -    | -    | -                     | -    | -    | 0.02             | 0.15             | 0.08             |
|              | 6th      | 25.0   | 0.60           | 0.13                  | 0.20 | 0.17 | 0.11                  | 0.27 | 0.22 | 0.04                  | 0.30 | 0.16 | 0.08                  | 0.39 | 0.19 | 0.06                  | 0.13 | 0.10 | 0.06                  | 0.24 | 0.14 | -                     | -    | -    | -                     | -    | -    | 0.04             | 0.39             | 0.16             |
|              | 7th      | 35.1   | 0.84           | 0.04                  | 0.27 | 0.20 | 0.03                  | 0.48 | 0.28 | 0.05                  | 0.44 | 0.22 | 0.16                  | 0.50 | 0.30 | 0.08                  | 0.20 | 0.15 | 0.05                  | 0.37 | 0.23 | -                     | -    | -    | -                     | -    | -    | 0.03             | 0.50             | 0.23             |
|              | 8th      | 39.6   | 0.94           | 0.04                  | 0.30 | 0.22 | 0.02                  | 0.51 | 0.29 | 0.03                  | 0.51 | 0.26 | 0.16                  | 0.50 | 0.31 | 0.05                  | 0.31 | 0.19 | 0.05                  | 0.41 | 0.22 | -                     | -    | -    | -                     | -    | -    | 0.02             | 0.51             | 0.25             |
| M5-FA-10-(C) | 1st      | 11.3   | 0.27           | 0.03                  | 0.05 | 0.04 | 0.04                  | 0.04 | 0.04 | -                     | -    | -    | -                     | -    | -    | -                     | -    | -    | -                     | -    | -    | -                     | -    | -    | -                     | -    | -    | 0.03             | 0.05             | 0.04             |
|              | 2nd      | 12.4   | 0.30           | 0.05                  | 0.08 | 0.06 | 0.05                  | 0.05 | 0.05 | 0.04                  | 0.04 | 0.04 | -                     | -    | -    | -                     | -    | -    | -                     | -    | -    | -                     | -    | -    | -                     | -    | -    | 0.04             | 0.08             | 0.05             |
|              | 3rd      | 14.0   | 0.33           | 0.09                  | 0.13 | 0.11 | 0.06                  | 0.07 | 0.06 | 0.06                  | 0.07 | 0.06 | 0.03                  | 0.04 | 0.03 | 0.05                  | 0.10 | 0.07 | -                     | -    | -    | -                     | -    | -    | -                     | -    | -    | 0.03             | 0.13             | 0.07             |
|              | 4th      | 16.5   | 0.39           | 0.08                  | 0.17 | 0.12 | 0.04                  | 0.08 | 0.06 | 0.04                  | 0.10 | 0.07 | 0.03                  | 0.12 | 0.07 | 0.05                  | 0.16 | 0.11 | 0.04                  | 0.05 | 0.04 | -                     | -    | -    | -                     | -    | -    | 0.03             | 0.17             | 0.08             |
|              | 5th      | 26.3   | 0.63           | 0.05                  | 0.30 | 0.17 | 0.06                  | 0.14 | 0.11 | 0.10                  | 0.27 | 0.19 | 0.03                  | 0.28 | 0.16 | 0.08                  | 0.26 | 0.19 | 0.04                  | 0.15 | 0.11 | -                     | -    | -    | -                     | -    | -    | 0.03             | 0.30             | 0.15             |
|              | 6th      | 33.2   | 0.79           | 0.06                  | 0.40 | 0.23 | 0.11                  | 0.24 | 0.16 | 0.11                  | 0.31 | 0.23 | 0.12                  | 0.37 | 0.28 | 0.11                  | 0.28 | 0.20 | 0.08                  | 0.20 | 0.15 | 0.05                  | 0.23 | 0.16 | -                     | -    | -    | 0.05             | 0.40             | 0.20             |
|              | 7th      | 40.8   | 0.97           | 0.07                  | 0.47 | 0.24 | 0.15                  | 0.47 | 0.24 | 0.16                  | 0.40 | 0.29 | 0.16                  | 0.45 | 0.31 | 0.13                  | 0.36 | 0.26 | 0.08                  | 0.25 | 0.19 | 0.11                  | 0.35 | 0.24 | -                     | -    | -    | 0.07             | 0.47             | 0.25             |
| M5-FA-10-(D) | 1st      | 10.7   | 0.25           | 0.05                  | 0.07 | 0.06 | -                     | -    | -    | -                     | -    | -    | -                     | -    | -    | -                     | -    | -    | -                     | -    | -    | -                     | -    | -    | -                     | -    | -    | 0.05             | 0.07             | 0.06             |
|              | 2nd      | 11.6   | 0.28           | 0.04                  | 0.10 | 0.07 | 0.05                  | 0.06 | 0.06 | -                     | -    | -    | -                     | -    | -    | -                     | -    | -    | -                     | -    | -    | -                     | -    | -    | -                     | -    | -    | 0.04             | 0.10             | 0.06             |
|              | 3rd      | 14.2   | 0.34           | 0.03                  | 0.18 | 0.10 | 0.05                  | 0.13 | 0.09 | 0.03                  | 0.05 | 0.04 | 0.05                  | 0.11 | 0.07 | 0.06                  | 0.09 | 0.07 | -                     | -    | -    | -                     | -    | -    | -                     | -    | -    | 0.03             | 0.18             | 0.08             |
|              | 4th      | 16.1   | 0.38           | 0.07                  | 0.19 | 0.13 | 0.04                  | 0.17 | 0.11 | 0.02                  | 0.10 | 0.07 | 0.08                  | 0.14 | 0.10 | 0.11                  | 0.14 | 0.12 | 0.03                  | 0.10 | 0.06 | -                     | -    | -    | -                     | -    | -    | 0.02             | 0.19             | 0.10             |
|              | 5th      | 28.3   | 0.68           | 0.06                  | 0.30 | 0.21 | 0.05                  | 0.29 | 0.18 | 0.05                  | 0.28 | 0.18 | 0.19                  | 0.25 | 0.21 | 0.16                  | 0.28 | 0.23 | 0.05                  | 0.29 | 0.19 | -                     | -    | -    | -                     | -    | -    | 0.05             | 0.30             | 0.20             |
|              | 6th      | 42.0   | 1.00           | 0.06                  | 0.45 | 0.31 | 0.04                  | 0.40 | 0.25 | 0.04                  | 0.45 | 0.29 | 0.04                  | 0.35 | 0.21 | 0.06                  | 0.41 | 0.24 | 0.06                  | 0.50 | 0.29 | -                     | -    | -    | -                     | -    | -    | 0.04             | 0.50             | 0.26             |
| M5-FA-12-(A) | 1st      | 11.7   | 0.19           | 0.05                  | 0.09 | 0.06 | -                     | -    | -    | -                     | -    | -    | -                     | -    | -    | -                     | -    | -    | -                     | -    | -    | -                     | -    | -    | -                     | -    | -    | 0.05             | 0.09             | 0.06             |
|              | 2nd      | 14.3   | 0.24           | 0.05                  | 0.10 | 0.07 | 0.03                  | 0.11 | 0.06 | 0.05                  | 0.15 | 0.08 | 0.05                  | 0.05 | 0.05 | -                     | -    | -    | -                     | -    | -    | -                     | -    | -    | -                     | -    | -    | 0.03             | 0.15             | 0.07             |
|              | 3rd      | 19.4   | 0.32           | 0.08                  | 0.13 | 0.10 | 0.04                  | 0.24 | 0.08 | 0.04                  | 0.17 | 0.09 | 0.05                  | 0.09 | 0.07 | 0.03                  | 0.05 | 0.05 | -                     | -    | -    | -                     | -    | -    | -                     | -    | -    | 0.03             | 0.24             | 0.08             |
|              | 4th      | 26.1   | 0.43           | 0.11                  | 0.17 | 0.14 | 0.04                  | 0.25 | 0.11 | 0.05                  | 0.20 | 0.12 | 0.07                  | 0.14 | 0.11 | 0.03                  | 0.08 | 0.05 | 0.05                  | 0.13 | 0.10 | 0.04                  | 0.11 | 0.07 | -                     | -    | -    | 0.03             | 0.25             | 0.10             |
|              | 5th      | 34.0   | 0.56           | 0.04                  | 0.29 | 0.18 | 0.04                  | 0.26 | 0.12 | 0.06                  | 0.25 | 0.14 | 0.06                  | 0.28 | 0.16 | 0.05                  | 0.09 | 0.07 | 0.07                  | 0.28 | 0.17 | 0.02                  | 0.30 | 0.17 | -                     | -    | -    | 0.02             | 0.30             | 0.15             |
|              | 6th      | 56.0   | 0.93           | 0.06                  | 0.39 | 0.22 | 0.06                  | 0.27 | 0.14 | 0.09                  | 0.40 | 0.21 | 0.06                  | 0.38 | 0.24 | 0.07                  | 0.18 | 0.12 | 0.12                  | 0.44 | 0.32 | 0.07                  | 0.43 | 0.23 | -                     | -    | -    | 0.06             | 0.44             | 0.21             |
| M5-FA-12-(B) | 1st      | 13.4   | 0.22           | 0.06                  | 0.11 | 0.08 | 0.05                  | 0.12 | 0.08 | 0.03                  | 0.07 | 0.05 | -                     | -    | -    | -                     | -    | -    | -                     | -    | -    | -                     | -    | -    | -                     | -    | -    | 0.03             | 0.12             | 0.07             |
|              | 2nd      | 17.1   | 0.28           | 0.10                  | 0.16 | 0.13 | 0.06                  | 0.14 | 0.10 | 0.08                  | 0.12 | 0.10 | 0.06                  | 0.09 | 0.07 | 0.05                  | 0.10 | 0.07 | -                     | -    | -    | -                     | -    | -    | -                     | -    | -    | 0.05             | 0.16             | 0.09             |

| Spec. ID.    | Sta. NO. | P (kN) | (σ/Fy) | 1 <sup>st</sup> crack |      |      | 2 <sup>nd</sup> crack |      |      | 3 <sup>rd</sup> crack |      |      | 4 <sup>th</sup> crack |      |      | 5 <sup>th</sup> crack |      |      | 6 <sup>th</sup> crack |      |      | 7 <sup>th</sup> crack |      |      | 8 <sup>th</sup> crack |      |      | Min. crack width | Max. crack width | Ave. crack width |
|--------------|----------|--------|--------|-----------------------|------|------|-----------------------|------|------|-----------------------|------|------|-----------------------|------|------|-----------------------|------|------|-----------------------|------|------|-----------------------|------|------|-----------------------|------|------|------------------|------------------|------------------|
|              |          |        |        | Min.                  | Max. | Ave. | Min.             | Max.             | Ave.             |
| M5-FA-12-(C) | 3rd      | 25.0   | 0.41   | 0.05                  | 0.21 | 0.12 | 0.15                  | 0.20 | 0.17 | 0.04                  | 0.21 | 0.13 | 0.13                  | 0.25 | 0.19 | 0.08                  | 0.19 | 0.14 | -                     | -    | -    | -                     | -    | -    | -                     | -    | -    | 0.04             | 0.25             | 0.15             |
|              | 4th      | 35.0   | 0.58   | 0.05                  | 0.25 | 0.17 | 0.05                  | 0.30 | 0.21 | 0.05                  | 0.35 | 0.20 | 0.06                  | 0.35 | 0.23 | 0.05                  | 0.32 | 0.20 | -                     | -    | -    | -                     | -    | -    | -                     | -    | -    | 0.05             | 0.35             | 0.20             |
|              | 5th      | 45.0   | 0.75   | 0.06                  | 0.31 | 0.19 | 0.08                  | 0.38 | 0.28 | 0.05                  | 0.36 | 0.22 | 0.06                  | 0.46 | 0.32 | 0.12                  | 0.37 | 0.28 | -                     | -    | -    | -                     | -    | -    | -                     | -    | -    | 0.05             | 0.46             | 0.26             |
|              | 6th      | 52.0   | 0.86   | 0.09                  | 0.40 | 0.22 | 0.11                  | 0.44 | 0.28 | 0.04                  | 0.49 | 0.27 | 0.03                  | 0.49 | 0.32 | 0.04                  | 0.50 | 0.31 | 0.05                  | 0.17 | 0.13 | -                     | -    | -    | -                     | -    | -    | 0.03             | 0.50             | 0.26             |
|              | 1st      | 15.6   | 0.26   | 0.07                  | 0.11 | 0.09 | 0.06                  | 0.07 | 0.06 | 0.07                  | 0.08 | 0.07 | 0.08                  | 0.08 | 0.08 | 0.04                  | 0.04 | 0.04 | -                     | -    | -    | -                     | -    | -    | -                     | -    | -    | 0.04             | 0.11             | 0.07             |
|              | 2nd      | 23.1   | 0.38   | 0.07                  | 0.19 | 0.15 | 0.06                  | 0.12 | 0.10 | 0.08                  | 0.13 | 0.12 | 0.07                  | 0.14 | 0.10 | 0.08                  | 0.13 | 0.11 | 0.05                  | 0.07 | 0.06 | 0.06                  | 0.06 | 0.06 | -                     | -    | -    | 0.05             | 0.19             | 0.10             |
| M5-FA-12-(D) | 3rd      | 33.7   | 0.56   | 0.07                  | 0.28 | 0.20 | 0.08                  | 0.22 | 0.15 | 0.11                  | 0.23 | 0.18 | 0.12                  | 0.28 | 0.19 | 0.05                  | 0.23 | 0.15 | 0.15                  | 0.22 | 0.18 | 0.06                  | 0.13 | 0.10 | -                     | -    | -    | 0.05             | 0.28             | 0.16             |
|              | 4th      | 43.1   | 0.71   | 0.10                  | 0.35 | 0.24 | 0.04                  | 0.28 | 0.18 | 0.05                  | 0.31 | 0.22 | 0.05                  | 0.33 | 0.19 | 0.07                  | 0.34 | 0.20 | 0.19                  | 0.29 | 0.23 | 0.06                  | 0.26 | 0.13 | -                     | -    | -    | 0.04             | 0.35             | 0.20             |
|              | 5th      | 54.3   | 0.90   | 0.07                  | 0.44 | 0.27 | 0.07                  | 0.36 | 0.23 | 0.09                  | 0.39 | 0.25 | 0.04                  | 0.36 | 0.21 | 0.09                  | 0.35 | 0.25 | 0.21                  | 0.38 | 0.30 | 0.04                  | 0.36 | 0.20 | -                     | -    | -    | 0.04             | 0.44             | 0.24             |
|              | 1st      | 12.4   | 0.21   | 0.04                  | 0.08 | 0.06 | 0.04                  | 0.05 | 0.04 | 0.06                  | 0.09 | 0.07 | -                     | -    | -    | -                     | -    | -    | -                     | -    | -    | -                     | -    | -    | -                     | -    | -    | 0.04             | 0.09             | 0.06             |
|              | 2nd      | 14.3   | 0.24   | 0.05                  | 0.09 | 0.07 | 0.06                  | 0.06 | 0.06 | 0.04                  | 0.11 | 0.07 | 0.04                  | 0.05 | 0.05 | -                     | -    | -    | -                     | -    | -    | -                     | -    | -    | -                     | -    | -    | 0.04             | 0.11             | 0.06             |
|              | 3rd      | 16.0   | 0.26   | 0.04                  | 0.11 | 0.06 | 0.06                  | 0.07 | 0.07 | 0.04                  | 0.13 | 0.09 | 0.04                  | 0.06 | 0.05 | 0.05                  | 0.06 | 0.05 | -                     | -    | -    | -                     | -    | -    | -                     | -    | -    | 0.04             | 0.13             | 0.06             |
|              | 4th      | 20.2   | 0.33   | 0.06                  | 0.20 | 0.13 | 0.03                  | 0.09 | 0.06 | 0.05                  | 0.16 | 0.11 | 0.05                  | 0.09 | 0.07 | 0.05                  | 0.10 | 0.07 | 0.04                  | 0.06 | 0.05 | -                     | -    | -    | -                     | -    | -    | 0.03             | 0.20             | 0.08             |
|              | 5th      | 30.7   | 0.51   | 0.03                  | 0.31 | 0.19 | 0.04                  | 0.19 | 0.10 | 0.05                  | 0.22 | 0.14 | 0.03                  | 0.19 | 0.11 | 0.06                  | 0.16 | 0.10 | 0.06                  | 0.07 | 0.07 | -                     | -    | -    | -                     | -    | -    | 0.03             | 0.31             | 0.12             |
| M5-FA-16-(A) | 6th      | 36.9   | 0.61   | 0.06                  | 0.43 | 0.23 | 0.03                  | 0.25 | 0.14 | 0.05                  | 0.25 | 0.15 | 0.05                  | 0.22 | 0.14 | 0.06                  | 0.22 | 0.13 | 0.04                  | 0.08 | 0.05 | 0.07                  | 0.11 | 0.10 | -                     | -    | -    | 0.03             | 0.43             | 0.14             |
|              | 7th      | 47.1   | 0.78   | 0.06                  | 0.48 | 0.32 | 0.04                  | 0.33 | 0.18 | 0.06                  | 0.33 | 0.18 | 0.03                  | 0.28 | 0.17 | 0.03                  | 0.30 | 0.10 | 0.04                  | 0.11 | 0.07 | 0.11                  | 0.19 | 0.16 | -                     | -    | -    | 0.03             | 0.48             | 0.17             |
|              | 8th      | 55.0   | 0.91   | 0.07                  | 0.50 | 0.32 | 0.05                  | 0.34 | 0.19 | 0.09                  | 0.39 | 0.20 | 0.03                  | 0.32 | 0.19 | 0.06                  | 0.36 | 0.17 | 0.06                  | 0.15 | 0.10 | 0.11                  | 0.27 | 0.19 | -                     | -    | -    | 0.03             | 0.50             | 0.20             |
|              | 1st      | 15.7   | 0.15   | 0.04                  | 0.07 | 0.05 | -                     | -    | -    | -                     | -    | -    | -                     | -    | -    | -                     | -    | -    | -                     | -    | -    | -                     | -    | -    | -                     | -    | -    | 0.04             | 0.07             | 0.05             |
|              | 2nd      | 25.8   | 0.24   | 0.04                  | 0.10 | 0.06 | 0.03                  | 0.09 | 0.06 | 0.05                  | 0.07 | 0.06 | -                     | -    | -    | -                     | -    | -    | -                     | -    | -    | -                     | -    | -    | -                     | -    | -    | 0.03             | 0.10             | 0.06             |
|              | 3rd      | 30.1   | 0.28   | 0.05                  | 0.12 | 0.07 | 0.04                  | 0.14 | 0.09 | 0.05                  | 0.08 | 0.07 | 0.05                  | 0.10 | 0.08 | 0.03                  | 0.07 | 0.05 | 0.05                  | 0.08 | 0.06 | -                     | -    | -    | -                     | -    | -    | 0.03             | 0.14             | 0.07             |
|              | 4th      | 41.7   | 0.39   | 0.04                  | 0.14 | 0.07 | 0.05                  | 0.21 | 0.14 | 0.05                  | 0.12 | 0.08 | 0.06                  | 0.14 | 0.09 | 0.06                  | 0.15 | 0.10 | 0.04                  | 0.13 | 0.08 | 0.07                  | 0.15 | 0.10 | -                     | -    | -    | 0.04             | 0.21             | 0.10             |
|              | 5th      | 55.0   | 0.51   | 0.05                  | 0.18 | 0.11 | 0.07                  | 0.27 | 0.18 | 0.09                  | 0.18 | 0.13 | 0.06                  | 0.17 | 0.10 | 0.09                  | 0.18 | 0.12 | 0.06                  | 0.15 | 0.11 | 0.07                  | 0.22 | 0.16 | -                     | -    | -    | 0.05             | 0.27             | 0.13             |
| M5-FA-16-(B) | 6th      | 70.2   | 0.65   | 0.03                  | 0.22 | 0.13 | 0.06                  | 0.33 | 0.22 | 0.08                  | 0.21 | 0.16 | 0.08                  | 0.22 | 0.15 | 0.07                  | 0.22 | 0.14 | 0.04                  | 0.18 | 0.12 | 0.09                  | 0.26 | 0.17 | -                     | -    | -    | 0.03             | 0.33             | 0.16             |
|              | 7th      | 85.7   | 0.80   | 0.05                  | 0.29 | 0.17 | 0.16                  | 0.38 | 0.29 | 0.15                  | 0.25 | 0.20 | 0.12                  | 0.26 | 0.17 | 0.10                  | 0.29 | 0.20 | 0.07                  | 0.22 | 0.15 | 0.17                  | 0.35 | 0.26 | -                     | -    | -    | 0.05             | 0.38             | 0.21             |
|              | 8th      | #####  | 0.93   | 0.04                  | 0.32 | 0.19 | 0.06                  | 0.44 | 0.28 | 0.12                  | 0.38 | 0.22 | 0.10                  | 0.33 | 0.21 | 0.09                  | 0.31 | 0.21 | 0.13                  | 0.24 | 0.19 | 0.10                  | 0.38 | 0.24 | -                     | -    | -    | 0.04             | 0.44             | 0.22             |
|              | 1st      | 19.8   | 0.18   | 0.04                  | 0.07 | 0.05 | 0.02                  | 0.05 | 0.04 | -                     | -    | -    | -                     | -    | -    | -                     | -    | -    | -                     | -    | -    | -                     | -    | -    | -                     | -    | -    | 0.02             | 0.07             | 0.04             |
|              | 2nd      | 22.3   | 0.21   | 0.04                  | 0.09 | 0.06 | 0.06                  | 0.07 | 0.06 | 0.04                  | 0.08 | 0.05 | 0.03                  | 0.09 | 0.06 | -                     | -    | -    | -                     | -    | -    | -                     | -    | -    | -                     | -    | -    | 0.03             | 0.09             | 0.06             |
|              | 3rd      | 27.0   | 0.25   | 0.04                  | 0.10 | 0.08 | 0.03                  | 0.08 | 0.06 | 0.03                  | 0.09 | 0.06 | 0.06                  | 0.15 | 0.10 | 0.04                  | 0.09 | 0.07 | 0.02                  | 0.09 | 0.05 | -                     | -    | -    | -                     | -    | -    | 0.02             | 0.15             | 0.07             |
|              | 4th      | 42.4   | 0.39   | 0.05                  | 0.17 | 0.11 | 0.04                  | 0.14 | 0.09 | 0.04                  | 0.17 | 0.10 | 0.12                  | 0.20 | 0.17 | 0.05                  | 0.18 | 0.11 | 0.05                  | 0.11 | 0.08 | 0.06                  | 0.09 | 0.07 | -                     | -    | -    | 0.04             | 0.20             | 0.11             |
|              | 5th      | 60.1   | 0.56   | 0.05                  | 0.23 | 0.13 | 0.04                  | 0.20 | 0.12 | 0.03                  | 0.26 | 0.14 | 0.09                  | 0.30 | 0.19 | 0.09                  | 0.26 | 0.17 | 0.04                  | 0.10 | 0.07 | 0.05                  | 0.15 | 0.09 | -                     | -    | -    | 0.03             | 0.30             | 0.13             |
| M5-FA-16-(C) | 6th      | 75.2   | 0.70   | 0.06                  | 0.26 | 0.14 | 0.06                  | 0.23 | 0.15 | 0.02                  | 0.29 | 0.14 | 0.07                  | 0.39 | 0.23 | 0.11                  | 0.29 | 0.20 | 0.04                  | 0.17 | 0.10 | 0.04                  | 0.23 | 0.14 | -                     | -    | -    | 0.02             | 0.39             | 0.16             |
|              | 7th      | 94.0   | 0.88   | 0.06                  | 0.30 | 0.18 | 0.05                  | 0.28 | 0.15 | 0.03                  | 0.35 | 0.20 | 0.09                  | 0.43 | 0.25 | 0.06                  | 0.30 | 0.17 | 0.05                  | 0.20 | 0.12 | 0.04                  | 0.26 | 0.13 | -                     | -    | -    | 0.03             | 0.43             | 0.17             |
|              | 1st      | 16.3   | 0.15   | 0.03                  | 0.04 | 0.04 | 0.04                  | 0.06 | 0.05 | 0.03                  | 0.03 | 0.03 | -                     | -    | -    | -                     | -    | -    | -                     | -    | -    | -                     | -    | -    | -                     | -    | -    | 0.03             | 0.06             | 0.04             |
|              | 2nd      | 18.2   | 0.17   | 0.04                  | 0.09 | 0.05 | 0.05                  | 0.09 | 0.07 | 0.02                  | 0.08 | 0.05 | 0.05                  | 0.07 | 0.06 | -                     | -    | -    | -                     | -    | -    | -                     | -    | -    | -                     | -    | -    | 0.02             | 0.09             | 0.06             |
|              | 3rd      | 20.3   | 0.19   | 0.05                  | 0.10 | 0.06 | 0.06                  | 0.14 | 0.10 | 0.06                  | 0.09 | 0.07 | 0.05                  | 0.08 | 0.06 | 0.04                  | 0.05 | 0.04 | -                     | -    | -    | -                     | -    | -    | -                     | -    | -    | 0.04             | 0.14             | 0.07             |

| Spec. ID.    | Sta. NO. | P (kN) | (σ/Fy) | 1 <sup>st</sup> crack |      |      | 2 <sup>nd</sup> crack |      |      | 3 <sup>rd</sup> crack |        |       | 4 <sup>th</sup> crack |      |      | 5 <sup>th</sup> crack |      |      | 6 <sup>th</sup> crack |      |      | 7 <sup>th</sup> crack |      |      | 8 <sup>th</sup> crack |      |      | Min. crack width | Max. crack width | Ave. crack width |      |
|--------------|----------|--------|--------|-----------------------|------|------|-----------------------|------|------|-----------------------|--------|-------|-----------------------|------|------|-----------------------|------|------|-----------------------|------|------|-----------------------|------|------|-----------------------|------|------|------------------|------------------|------------------|------|
|              |          |        |        | Min.                  | Max. | Ave. | Min.                  | Max. | Ave. | Min.                  | Max.   | Ave.  | Min.                  | Max. | Ave. | Min.                  | Max. | Ave. | Min.                  | Max. | Ave. | Min.                  | Max. | Ave. | Min.                  | Max. | Ave. | Min.             | Max.             | Ave.             |      |
| M5-FA-16-(D) | 4th      | 35.3   | 0.33   | 0.04                  | 0.19 | 0.12 | 0.07                  | 0.22 | 0.14 | 0.03                  | 0.18   | 0.11  | 0.05                  | 0.14 | 0.08 | 0.07                  | 0.13 | 0.10 | 0.03                  | 0.06 | 0.04 | -                     | -    | -    | -                     | -    | -    | 0.03             | 0.22             | 0.10             |      |
|              | 5th      | 47.4   | 0.44   | 0.05                  | 0.26 | 0.15 | 0.06                  | 0.29 | 0.16 | 0.08                  | 0.25   | 0.14  | 0.05                  | 0.18 | 0.11 | 0.11                  | 0.19 | 0.15 | 0.03                  | 0.07 | 0.05 | 0.05                  | 0.05 | 0.05 | -                     | -    | -    | 0.03             | 0.29             | 0.11             |      |
|              | 6th      | 62.3   | 0.58   | 0.05                  | 0.29 | 0.18 | 0.08                  | 0.33 | 0.20 | 0.06                  | 0.27   | 0.15  | 0.07                  | 0.27 | 0.16 | 0.06                  | 0.26 | 0.17 | 0.02                  | 0.11 | 0.08 | 0.06                  | 0.06 | 0.06 | -                     | -    | -    | 0.02             | 0.33             | 0.14             |      |
|              | 7th      | 77.2   | 0.72   | 0.04                  | 0.33 | 0.19 | 0.09                  | 0.41 | 0.22 | 0.07                  | 0.33   | 0.19  | 0.04                  | 0.29 | 0.14 | 0.08                  | 0.29 | 0.16 | 0.05                  | 0.20 | 0.12 | 0.06                  | 0.08 | 0.07 | 0.09                  | 0.10 | 0.10 | 0.04             | 0.41             | 0.15             |      |
|              | 8th      | 92.6   | 0.86   | 0.05                  | 0.34 | 0.18 | 0.04                  | 0.38 | 0.21 | 0.06                  | 0.42   | 0.21  | 0.04                  | 0.34 | 0.18 | 0.06                  | 0.30 | 0.17 | 0.04                  | 0.21 | 0.13 | 0.06                  | 0.09 | 0.07 | 0.11                  | 0.13 | 0.12 | 0.04             | 0.42             | 0.16             |      |
|              | 1st      | 19.2   | 0.18   | 0.03                  | 0.03 | 0.03 | -                     | -    | -    | -                     | -      | -     | -                     | -    | -    | -                     | -    | -    | -                     | -    | -    | -                     | -    | -    | -                     | -    | -    | -                | 0.03             | 0.03             | 0.03 |
|              | 2nd      | 21.5   | 0.20   | 0.04                  | 0.04 | 0.04 | 0.06                  | 0.06 | 0.06 | -                     | -      | -     | -                     | -    | -    | -                     | -    | -    | -                     | -    | -    | -                     | -    | -    | -                     | -    | -    | -                | 0.04             | 0.06             | 0.05 |
|              | 3rd      | 22.9   | 0.21   | 0.04                  | 0.05 | 0.05 | 0.03                  | 0.08 | 0.05 | 0.05                  | 0.05   | 0.05  | 0.04                  | 0.04 | 0.04 | -                     | -    | -    | -                     | -    | -    | -                     | -    | -    | -                     | -    | -    | -                | 0.03             | 0.08             | 0.05 |
|              | 4th      | 28.1   | 0.26   | 0.03                  | 0.08 | 0.06 | 0.05                  | 0.12 | 0.08 | 0.04                  | 0.10   | 0.07  | 0.04                  | 0.07 | 0.06 | 0.02                  | 0.03 | 0.03 | -                     | -    | -    | -                     | -    | -    | -                     | -    | -    | -                | 0.02             | 0.12             | 0.06 |
| 5th          | 38.1     | 0.35   | 0.04   | 0.13                  | 0.07 | 0.08 | 0.17                  | 0.12 | 0.08 | 0.15                  | 0.11   | 0.05  | 0.15                  | 0.09 | 0.05 | 0.13                  | 0.09 | 0.05 | 0.08                  | 0.06 | -    | -                     | -    | -    | -                     | -    | -    | 0.04             | 0.17             | 0.09             |      |
| 6th          | 53.1     | 0.49   | 0.05   | 0.22                  | 0.12 | 0.13 | 0.20                  | 0.17 | 0.06 | 0.24                  | 0.14   | 0.05  | 0.20                  | 0.13 | 0.11 | 0.18                  | 0.14 | 0.04 | 0.10                  | 0.08 | -    | -                     | -    | -    | -                     | -    | -    | 0.04             | 0.24             | 0.13             |      |
| 7th          | 68.4     | 0.64   | 0.06   | 0.29                  | 0.16 | 0.13 | 0.29                  | 0.22 | 0.06 | 0.29                  | 0.15   | 0.03  | 0.25                  | 0.17 | 0.06 | 0.22                  | 0.15 | 0.07 | 0.17                  | 0.11 | 0.04 | 0.07                  | 0.06 | -    | -                     | -    | -    | 0.03             | 0.29             | 0.15             |      |
| 8th          | 82.0     | 0.76   | 0.07   | 0.35                  | 0.21 | 0.03 | 0.32                  | 0.18 | 0.09 | 0.30                  | 0.18   | 0.04  | 0.30                  | 0.17 | 0.05 | 0.28                  | 0.17 | 0.06 | 0.20                  | 0.13 | 0.07 | 0.14                  | 0.10 | -    | -                     | -    | -    | 0.03             | 0.35             | 0.16             |      |
| 9th          | 92.5     | 0.86   | 0.06   | 0.38                  | 0.22 | 0.06 | 0.33                  | 0.19 | 0.02 | 0.38                  | 0.20   | 0.06  | 0.31                  | 0.18 | 0.06 | 0.31                  | 0.19 | 0.09 | 0.25                  | 0.14 | 0.10 | 0.17                  | 0.14 | -    | -                     | -    | -    | 0.02             | 0.38             | 0.18             |      |
| M8-FA-10-(A) | 1st      | 3.3    | 0.08   | 0.02                  | 0.04 | 0.03 | -                     | -    | -    | -                     | -      | -     | -                     | -    | -    | -                     | -    | -    | -                     | -    | -    | -                     | -    | -    | -                     | -    | -    | -                | 0.02             | 0.04             | 0.03 |
|              | 2nd      | 3.6    | 0.09   | 0.13                  | 0.16 | 0.15 | 0.04                  | 0.14 | 0.06 | -                     | -      | -     | -                     | -    | -    | -                     | -    | -    | -                     | -    | -    | -                     | -    | -    | -                     | -    | -    | -                | 0.04             | 0.16             | 0.11 |
|              | 3rd      | 11.0   | 0.26   | 0.08                  | 0.22 | 0.16 | 0.05                  | 0.16 | 0.09 | 0.06                  | 0.14   | 0.10  | -                     | -    | -    | -                     | -    | -    | -                     | -    | -    | -                     | -    | -    | -                     | -    | -    | -                | 0.05             | 0.22             | 0.12 |
|              | 4th      | 13.4   | 0.32   | 0.04                  | 0.28 | 0.18 | 0.06                  | 0.19 | 0.12 | 0.02                  | 0.24   | 0.17  | 0.04                  | 0.09 | 0.08 | 0.04                  | 0.18 | 0.11 | -                     | -    | -    | -                     | -    | -    | -                     | -    | -    | -                | 0.02             | 0.28             | 0.13 |
|              | 5th      | 29.8   | 0.71   | 0.08                  | 0.48 | 0.34 | 0.11                  | 0.48 | 0.28 | 0.03                  | 0.51   | 0.28  | 0.02                  | 0.32 | 0.19 | 0.05                  | 0.51 | 0.27 | -                     | -    | -    | -                     | -    | -    | -                     | -    | -    | -                | 0.02             | 0.51             | 0.27 |
|              | 6th      | 39.4   | 0.94   | 0.05                  | 0.52 | 0.37 | 0.11                  | 0.56 | 0.30 | 0.08                  | 0.63   | 0.42  | 0.05                  | 0.49 | 0.29 | 0.06                  | 0.67 | 0.34 | -                     | -    | -    | -                     | -    | -    | -                     | -    | -    | -                | 0.05             | 0.67             | 0.34 |
| M8-FA-10-(B) | 1st      | 8.1    | 0.19   | 0.09                  | 0.13 | 0.11 | -                     | -    | -    | -                     | -      | -     | -                     | -    | -    | -                     | -    | -    | -                     | -    | -    | -                     | -    | -    | -                     | -    | -    | -                | 0.09             | 0.13             | 0.11 |
|              | 2nd      | 9.3    | 0.22   | 0.09                  | 0.20 | 0.15 | 0.03                  | 0.14 | 0.09 | -                     | -      | -     | -                     | -    | -    | -                     | -    | -    | -                     | -    | -    | -                     | -    | -    | -                     | -    | -    | -                | 0.03             | 0.20             | 0.12 |
|              | 3rd      | 10.5   | 0.25   | 0.15                  | 0.25 | 0.19 | 0.05                  | 0.19 | 0.13 | 0.0746                | 0.1088 | 0.093 | -                     | -    | -    | -                     | -    | -    | -                     | -    | -    | -                     | -    | -    | -                     | -    | -    | -                | 0.05             | 0.25             | 0.16 |
|              | 4th      | 15.5   | 0.37   | 0.05                  | 0.33 | 0.23 | 0.09                  | 0.28 | 0.18 | 0.12                  | 0.22   | 0.19  | 0.04                  | 0.21 | 0.13 | 0.08                  | 0.11 | 0.10 | -                     | -    | -    | -                     | -    | -    | -                     | -    | -    | -                | 0.04             | 0.33             | 0.21 |
|              | 5th      | 25.2   | 0.60   | 0.04                  | 0.49 | 0.29 | 0.13                  | 0.53 | 0.31 | 0.12                  | 0.32   | 0.23  | 0.10                  | 0.40 | 0.25 | 0.16                  | 0.25 | 0.20 | -                     | -    | -    | -                     | -    | -    | -                     | -    | -    | -                | 0.04             | 0.53             | 0.29 |
|              | 6th      | 29.4   | 0.70   | 0.03                  | 0.56 | 0.33 | 0.15                  | 0.61 | 0.38 | 0.15                  | 0.40   | 0.30  | 0.14                  | 0.47 | 0.35 | 0.22                  | 0.39 | 0.31 | -                     | -    | -    | -                     | -    | -    | -                     | -    | -    | -                | 0.03             | 0.61             | 0.36 |
|              | 7th      | 34.9   | 0.83   | 0.06                  | 0.62 | 0.37 | 0.16                  | 0.68 | 0.47 | 0.14                  | 0.55   | 0.31  | 0.15                  | 0.56 | 0.40 | 0.25                  | 0.54 | 0.39 | -                     | -    | -    | -                     | -    | -    | -                     | -    | -    | -                | 0.06             | 0.68             | 0.39 |
|              | 8th      | 38.7   | 0.92   | 0.06                  | 0.65 | 0.43 | 0.18                  | 0.69 | 0.50 | 0.20                  | 0.57   | 0.40  | 0.17                  | 0.60 | 0.48 | 0.18                  | 0.54 | 0.38 | -                     | -    | -    | -                     | -    | -    | -                     | -    | -    | -                | 0.06             | 0.69             | 0.43 |
| M8-FA-10-(C) | 1st      | 9.1    | 0.22   | 0.04                  | 0.04 | 0.04 | -                     | -    | -    | -                     | -      | -     | -                     | -    | -    | -                     | -    | -    | -                     | -    | -    | -                     | -    | -    | -                     | -    | -    | -                | 0.04             | 0.04             | 0.04 |
|              | 2nd      | 11.8   | 0.28   | 0.06                  | 0.11 | 0.09 | 0.03                  | 0.03 | 0.03 | 0.05                  | 0.07   | 0.05  | -                     | -    | -    | -                     | -    | -    | -                     | -    | -    | -                     | -    | -    | -                     | -    | -    | -                | 0.03             | 0.11             | 0.06 |
|              | 3rd      | 13.0   | 0.31   | 0.06                  | 0.14 | 0.10 | 0.04                  | 0.06 | 0.05 | 0.05                  | 0.10   | 0.08  | 0.03                  | 0.05 | 0.04 | -                     | -    | -    | -                     | -    | -    | -                     | -    | -    | -                     | -    | -    | -                | 0.03             | 0.14             | 0.07 |
|              | 4th      | 14.9   | 0.36   | 0.06                  | 0.16 | 0.11 | 0.06                  | 0.08 | 0.07 | 0.09                  | 0.12   | 0.10  | 0.09                  | 0.11 | 0.10 | 0.05                  | 0.10 | 0.07 | 0.04                  | 0.05 | 0.04 | -                     | -    | -    | -                     | -    | -    | -                | 0.04             | 0.16             | 0.08 |
|              | 5th      | 27.1   | 0.65   | 0.05                  | 0.34 | 0.19 | 0.09                  | 0.26 | 0.18 | 0.27                  | 0.36   | 0.31  | 0.08                  | 0.23 | 0.15 | 0.21                  | 0.32 | 0.26 | 0.09                  | 0.22 | 0.16 | -                     | -    | -    | -                     | -    | -    | -                | 0.05             | 0.36             | 0.21 |
|              | 6th      | 40.1   | 0.96   | 0.03                  | 0.45 | 0.25 | 0.09                  | 0.40 | 0.21 | 0.37                  | 0.62   | 0.47  | 0.11                  | 0.28 | 0.19 | 0.34                  | 0.50 | 0.42 | 0.05                  | 0.30 | 0.20 | -                     | -    | -    | -                     | -    | -    | -                | 0.03             | 0.62             | 0.29 |
| M8-FA-10-(D) | 1st      | 8.8    | 0.21   | 0.04                  | 0.06 | 0.07 | -                     | -    | -    | -                     | -      | -     | -                     | -    | -    | -                     | -    | -    | -                     | -    | -    | -                     | -    | -    | -                     | -    | -    | -                | 0.04             | 0.07             | 0.07 |
|              | 2nd      | 11.9   | 0.28   | 0.07                  | 0.12 | 0.10 | 0.05                  | 0.05 | 0.05 | 0.06                  | 0.06   | 0.06  | 0.07                  | 0.07 | 0.07 | -                     | -    | -    | -                     | -    | -    | -                     | -    | -    | -                     | -    | -    | -                | 0.05             | 0.12             | 0.07 |

| Spec. ID.    | Sta. NO. | P (kN) | (σ/Fy) | 1 <sup>st</sup> crack |      |      | 2 <sup>nd</sup> crack |      |      | 3 <sup>rd</sup> crack |      |      | 4 <sup>th</sup> crack |      |      | 5 <sup>th</sup> crack |      |      | 6 <sup>th</sup> crack |      |      | 7 <sup>th</sup> crack |      |      | 8 <sup>th</sup> crack |      |      | Min. crack width | Max. crack width | Ave. crack width |
|--------------|----------|--------|--------|-----------------------|------|------|-----------------------|------|------|-----------------------|------|------|-----------------------|------|------|-----------------------|------|------|-----------------------|------|------|-----------------------|------|------|-----------------------|------|------|------------------|------------------|------------------|
|              |          |        |        | Min.                  | Max. | Ave. | Min.             | Max.             | Ave.             |
|              | 3rd      | 15.2   | 0.36   | 0.14                  | 0.17 | 0.15 | 0.11                  | 0.15 | 0.13 | 0.05                  | 0.13 | 0.09 | 0.03                  | 0.10 | 0.06 | 0.03                  | 0.03 | 0.03 | 0.05                  | 0.08 | 0.06 | -                     | -    | -    | -                     | -    | -    | 0.03             | 0.17             | 0.09             |
|              | 4th      | 27.2   | 0.65   | 0.31                  | 0.40 | 0.37 | 0.30                  | 0.35 | 0.33 | 0.17                  | 0.23 | 0.21 | 0.13                  | 0.23 | 0.18 | 0.12                  | 0.18 | 0.16 | 0.17                  | 0.24 | 0.21 | -                     | -    | -    | -                     | -    | -    | 0.12             | 0.40             | 0.24             |
|              | 5th      | 42.0   | 1.00   | 0.50                  | 0.67 | 0.59 | 0.40                  | 0.58 | 0.49 | 0.25                  | 0.32 | 0.29 | 0.24                  | 0.31 | 0.28 | 0.33                  | 0.43 | 0.37 | 0.30                  | 0.42 | 0.36 | -                     | -    | -    | -                     | -    | -    | 0.24             | 0.67             | 0.40             |
| M8-FA-12-(A) | 1st      | 9.9    | 0.16   | 0.04                  | 0.07 | 0.06 | -                     | -    | -    | -                     | -    | -    | -                     | -    | -    | -                     | -    | -    | -                     | -    | -    | -                     | -    | -    | -                     | -    | 0.04 | 0.07             | 0.06             |                  |
|              | 2nd      | 11.3   | 0.19   | 0.04                  | 0.10 | 0.06 | 0.04                  | 0.07 | 0.05 | -                     | -    | -    | -                     | -    | -    | -                     | -    | -    | -                     | -    | -    | -                     | -    | -    | -                     | -    | 0.04 | 0.10             | 0.06             |                  |
|              | 3rd      | 13.5   | 0.22   | 0.05                  | 0.13 | 0.08 | 0.06                  | 0.11 | 0.09 | 0.05                  | 0.08 | 0.07 | -                     | -    | -    | -                     | -    | -    | -                     | -    | -    | -                     | -    | -    | -                     | -    | 0.05 | 0.13             | 0.08             |                  |
|              | 4th      | 17.4   | 0.29   | 0.07                  | 0.22 | 0.16 | 0.09                  | 0.17 | 0.14 | 0.06                  | 0.15 | 0.12 | 0.06                  | 0.10 | 0.08 | -                     | -    | -    | -                     | -    | -    | -                     | -    | -    | -                     | -    | 0.06 | 0.22             | 0.12             |                  |
|              | 5th      | 26.2   | 0.43   | 0.13                  | 0.37 | 0.26 | 0.08                  | 0.26 | 0.20 | 0.09                  | 0.24 | 0.19 | 0.06                  | 0.17 | 0.12 | 0.05                  | 0.14 | 0.08 | -                     | -    | -    | -                     | -    | -    | -                     | -    | 0.05 | 0.37             | 0.17             |                  |
|              | 6th      | 29.1   | 0.48   | 0.05                  | 0.39 | 0.25 | 0.10                  | 0.35 | 0.24 | 0.07                  | 0.25 | 0.19 | 0.07                  | 0.21 | 0.15 | 0.06                  | 0.16 | 0.09 | 0.04                  | 0.15 | 0.10 | -                     | -    | -    | -                     | -    | -    | 0.04             | 0.39             | 0.17             |
|              | 7th      | 40.0   | 0.66   | 0.05                  | 0.51 | 0.29 | 0.06                  | 0.42 | 0.24 | 0.05                  | 0.32 | 0.20 | 0.05                  | 0.29 | 0.14 | 0.07                  | 0.17 | 0.12 | 0.07                  | 0.24 | 0.16 | -                     | -    | -    | -                     | -    | -    | 0.05             | 0.51             | 0.19             |
|              | 8th      | 54.6   | 0.90   | 0.13                  | 0.58 | 0.42 | 0.12                  | 0.50 | 0.27 | 0.10                  | 0.38 | 0.27 | 0.12                  | 0.43 | 0.25 | 0.07                  | 0.28 | 0.20 | 0.08                  | 0.35 | 0.18 | -                     | -    | -    | -                     | -    | -    | 0.07             | 0.58             | 0.27             |
| M8-FA-12-(B) | 1st      | 3.0    | 0.05   | 0.03                  | 0.06 | 0.05 | -                     | -    | -    | -                     | -    | -    | -                     | -    | -    | -                     | -    | -    | -                     | -    | -    | -                     | -    | -    | -                     | -    | 0.03 | 0.06             | 0.05             |                  |
|              | 2nd      | 8.3    | 0.14   | 0.04                  | 0.17 | 0.10 | 0.03                  | 0.25 | 0.13 | 0.03                  | 0.12 | 0.09 | -                     | -    | -    | -                     | -    | -    | -                     | -    | -    | -                     | -    | -    | -                     | -    | 0.03 | 0.25             | 0.10             |                  |
|              | 3rd      | 15.9   | 0.26   | 0.04                  | 0.23 | 0.14 | 0.02                  | 0.35 | 0.18 | 0.04                  | 0.26 | 0.17 | 0.03                  | 0.20 | 0.12 | -                     | -    | -    | -                     | -    | -    | -                     | -    | -    | -                     | -    | 0.02 | 0.35             | 0.15             |                  |
|              | 4th      | 25.1   | 0.42   | 0.06                  | 0.30 | 0.20 | 0.03                  | 0.39 | 0.22 | 0.09                  | 0.37 | 0.25 | 0.03                  | 0.22 | 0.14 | 0.06                  | 0.10 | 0.07 | 0.04                  | 0.08 | 0.06 | 0.06                  | 0.14 | 0.10 | -                     | -    | -    | 0.03             | 0.39             | 0.15             |
|              | 5th      | 40.0   | 0.66   | 0.06                  | 0.35 | 0.24 | 0.06                  | 0.45 | 0.29 | 0.06                  | 0.41 | 0.24 | 0.06                  | 0.40 | 0.22 | 0.08                  | 0.22 | 0.14 | 0.04                  | 0.17 | 0.10 | 0.09                  | 0.34 | 0.21 | -                     | -    | -    | 0.04             | 0.45             | 0.21             |
|              | 6th      | 49.7   | 0.82   | 0.05                  | 0.40 | 0.24 | 0.06                  | 0.47 | 0.24 | 0.05                  | 0.43 | 0.20 | 0.04                  | 0.43 | 0.17 | 0.04                  | 0.25 | 0.12 | 0.03                  | 0.20 | 0.07 | 0.04                  | 0.37 | 0.17 | -                     | -    | -    | 0.03             | 0.47             | 0.17             |
| M8-FA-12-(C) | 1st      | 12.3   | 0.20   | 0.03                  | 0.07 | 0.05 | 0.04                  | 0.05 | 0.04 | -                     | -    | -    | -                     | -    | -    | -                     | -    | -    | -                     | -    | -    | -                     | -    | -    | -                     | -    | 0.03 | 0.07             | 0.05             |                  |
|              | 2nd      | 14.2   | 0.23   | 0.05                  | 0.08 | 0.06 | 0.05                  | 0.07 | 0.06 | 0.02                  | 0.06 | 0.04 | 0.06                  | 0.07 | 0.06 | -                     | -    | -    | -                     | -    | -    | -                     | -    | -    | -                     | -    | 0.02 | 0.08             | 0.06             |                  |
|              | 3rd      | 17.0   | 0.28   | 0.05                  | 0.10 | 0.08 | 0.06                  | 0.10 | 0.09 | 0.03                  | 0.11 | 0.08 | 0.07                  | 0.12 | 0.09 | 0.05                  | 0.14 | 0.08 | 0.05                  | 0.10 | 0.07 | -                     | -    | -    | -                     | -    | 0.03 | 0.14             | 0.08             |                  |
|              | 4th      | 27.0   | 0.45   | 0.04                  | 0.17 | 0.10 | 0.14                  | 0.19 | 0.17 | 0.04                  | 0.23 | 0.12 | 0.04                  | 0.20 | 0.10 | 0.10                  | 0.15 | 0.12 | 0.06                  | 0.21 | 0.14 | -                     | -    | -    | -                     | -    | 0.04 | 0.23             | 0.12             |                  |
|              | 5th      | 37.6   | 0.62   | 0.06                  | 0.23 | 0.15 | 0.22                  | 0.30 | 0.26 | 0.05                  | 0.32 | 0.19 | 0.06                  | 0.31 | 0.19 | 0.05                  | 0.18 | 0.11 | 0.09                  | 0.34 | 0.19 | -                     | -    | -    | -                     | -    | 0.05 | 0.34             | 0.18             |                  |
|              | 6th      | 52.1   | 0.86   | 0.06                  | 0.31 | 0.20 | 0.10                  | 0.40 | 0.31 | 0.05                  | 0.39 | 0.26 | 0.09                  | 0.32 | 0.22 | 0.05                  | 0.27 | 0.18 | 0.10                  | 0.47 | 0.25 | -                     | -    | -    | -                     | -    | 0.05 | 0.47             | 0.24             |                  |
| M8-FA-12-(D) | 1st      | 11.5   | 0.19   | 0.04                  | 0.06 | 0.05 | -                     | -    | -    | -                     | -    | -    | -                     | -    | -    | -                     | -    | -    | -                     | -    | -    | -                     | -    | -    | -                     | -    | 0.04 | 0.06             | 0.05             |                  |
|              | 2nd      | 13.6   | 0.22   | 0.05                  | 0.07 | 0.06 | 0.06                  | 0.06 | 0.06 | -                     | -    | -    | -                     | -    | -    | -                     | -    | -    | -                     | -    | -    | -                     | -    | -    | -                     | -    | 0.05 | 0.07             | 0.06             |                  |
|              | 3rd      | 14.6   | 0.24   | 0.03                  | 0.08 | 0.06 | 0.06                  | 0.07 | 0.06 | 0.04                  | 0.05 | 0.05 | -                     | -    | -    | -                     | -    | -    | -                     | -    | -    | -                     | -    | -    | -                     | -    | 0.03 | 0.08             | 0.06             |                  |
|              | 4th      | 16.2   | 0.27   | 0.03                  | 0.09 | 0.07 | 0.05                  | 0.09 | 0.07 | 0.05                  | 0.09 | 0.07 | 0.06                  | 0.09 | 0.07 | -                     | -    | -    | -                     | -    | -    | -                     | -    | -    | -                     | -    | 0.03 | 0.09             | 0.07             |                  |
|              | 5th      | 18.3   | 0.30   | 0.06                  | 0.10 | 0.08 | 0.09                  | 0.11 | 0.10 | 0.04                  | 0.13 | 0.09 | 0.06                  | 0.10 | 0.08 | 0.05                  | 0.09 | 0.06 | -                     | -    | -    | -                     | -    | -    | -                     | -    | 0.04 | 0.13             | 0.08             |                  |
|              | 6th      | 28.5   | 0.47   | 0.05                  | 0.22 | 0.14 | 0.05                  | 0.27 | 0.17 | 0.04                  | 0.19 | 0.13 | 0.16                  | 0.19 | 0.18 | 0.12                  | 0.17 | 0.14 | -                     | -    | -    | -                     | -    | -    | -                     | -    | 0.04 | 0.27             | 0.15             |                  |
|              | 7th      | 33.7   | 0.56   | 0.05                  | 0.29 | 0.17 | 0.09                  | 0.33 | 0.22 | 0.05                  | 0.25 | 0.17 | 0.17                  | 0.22 | 0.19 | 0.15                  | 0.20 | 0.17 | 0.04                  | 0.05 | 0.04 | 0.05                  | 0.10 | 0.07 | -                     | -    | 0.04 | 0.33             | 0.15             |                  |
|              | 8th      | 43.3   | 0.72   | 0.06                  | 0.30 | 0.17 | 0.05                  | 0.42 | 0.25 | 0.05                  | 0.33 | 0.21 | 0.22                  | 0.23 | 0.23 | 0.23                  | 0.25 | 0.24 | 0.05                  | 0.08 | 0.06 | 0.07                  | 0.21 | 0.12 | -                     | -    | -    | 0.05             | 0.42             | 0.18             |
|              | 9th      | 55.0   | 0.91   | 0.05                  | 0.34 | 0.17 | 0.04                  | 0.51 | 0.28 | 0.07                  | 0.37 | 0.25 | 0.05                  | 0.31 | 0.24 | 0.06                  | 0.35 | 0.27 | 0.10                  | 0.14 | 0.11 | 0.04                  | 0.33 | 0.18 | -                     | -    | -    | 0.04             | 0.51             | 0.21             |
| M8-FA-16-(A) | 1st      | 10.6   | 0.10   | 0.04                  | 0.06 | 0.05 | -                     | -    | -    | -                     | -    | -    | -                     | -    | -    | -                     | -    | -    | -                     | -    | -    | -                     | -    | -    | -                     | -    | 0.04 | 0.06             | 0.05             |                  |
|              | 2nd      | 12.8   | 0.12   | 0.04                  | 0.07 | 0.05 | 0.05                  | 0.08 | 0.06 | -                     | -    | -    | -                     | -    | -    | -                     | -    | -    | -                     | -    | -    | -                     | -    | -    | -                     | -    | 0.04 | 0.08             | 0.05             |                  |
|              | 3rd      | 20.5   | 0.19   | 0.04                  | 0.11 | 0.07 | 0.04                  | 0.09 | 0.06 | 0.03                  | 0.04 | 0.04 | 0.04                  | 0.05 | 0.04 | -                     | -    | -    | -                     | -    | -    | -                     | -    | -    | -                     | -    | 0.03 | 0.11             | 0.05             |                  |
|              | 4th      | 23.5   | 0.22   | 0.03                  | 0.12 | 0.09 | 0.04                  | 0.10 | 0.08 | 0.03                  | 0.05 | 0.04 | 0.02                  | 0.06 | 0.04 | 0.05                  | 0.06 | 0.05 | 0.05                  | 0.11 | 0.07 | -                     | -    | -    | -                     | -    | 0.02 | 0.12             | 0.06             |                  |
|              | 5th      | 40.3   | 0.38   | 0.04                  | 0.16 | 0.10 | 0.05                  | 0.11 | 0.08 | 0.01                  | 0.11 | 0.09 | 0.04                  | 0.10 | 0.07 | 0.06                  | 0.22 | 0.14 | 0.06                  | 0.17 | 0.12 | -                     | -    | -    | -                     | -    | 0.01 | 0.22             | 0.10             |                  |

| Spec. ID.    | Sta. NO. | P (kN) | (σ/Fy) | 1 <sup>st</sup> crack |      |      | 2 <sup>nd</sup> crack |      |      | 3 <sup>rd</sup> crack |      |      | 4 <sup>th</sup> crack |      |      | 5 <sup>th</sup> crack |      |      | 6 <sup>th</sup> crack |      |      | 7 <sup>th</sup> crack |      |      | 8 <sup>th</sup> crack |      |      | Min. crack width | Max. crack width | Ave. crack width |
|--------------|----------|--------|--------|-----------------------|------|------|-----------------------|------|------|-----------------------|------|------|-----------------------|------|------|-----------------------|------|------|-----------------------|------|------|-----------------------|------|------|-----------------------|------|------|------------------|------------------|------------------|
|              |          |        |        | Min.                  | Max. | Ave. | Min.             | Max.             | Ave.             |
| M8-FA-16-(B) | 6th      | 55.2   | 0.51   | 0.07                  | 0.21 | 0.14 | 0.06                  | 0.20 | 0.13 | 0.12                  | 0.17 | 0.15 | 0.07                  | 0.13 | 0.10 | 0.04                  | 0.31 | 0.16 | 0.10                  | 0.27 | 0.19 | -                     | -    | -    | -                     | -    | -    | 0.04             | 0.31             | 0.14             |
|              | 7th      | 70.4   | 0.66   | 0.11                  | 0.27 | 0.19 | 0.03                  | 0.32 | 0.21 | 0.05                  | 0.24 | 0.14 | 0.05                  | 0.17 | 0.11 | 0.07                  | 0.48 | 0.25 | 0.04                  | 0.34 | 0.22 | -                     | -    | -    | -                     | -    | -    | 0.03             | 0.48             | 0.19             |
|              | 8th      | 93.5   | 0.87   | 0.15                  | 0.33 | 0.24 | 0.09                  | 0.45 | 0.25 | 0.04                  | 0.31 | 0.17 | 0.05                  | 0.19 | 0.13 | 0.07                  | 0.47 | 0.29 | 0.13                  | 0.38 | 0.23 | -                     | -    | -    | -                     | -    | -    | 0.04             | 0.47             | 0.22             |
|              | 1st      | 17.7   | 0.17   | 0.06                  | 0.10 | 0.08 | 0.04                  | 0.11 | 0.07 | 0.04                  | 0.06 | 0.05 | -                     | -    | -    | -                     | -    | -    | -                     | -    | -    | -                     | -    | -    | -                     | -    | -    | 0.04             | 0.11             | 0.07             |
|              | 2nd      | 22.9   | 0.21   | 0.10                  | 0.14 | 0.12 | 0.09                  | 0.12 | 0.10 | 0.08                  | 0.08 | 0.08 | 0.03                  | 0.06 | 0.05 | -                     | -    | -    | -                     | -    | -    | -                     | -    | -    | -                     | -    | -    | 0.03             | 0.14             | 0.09             |
|              | 3rd      | 31.7   | 0.30   | 0.12                  | 0.19 | 0.16 | 0.14                  | 0.19 | 0.16 | 0.10                  | 0.16 | 0.12 | 0.08                  | 0.12 | 0.10 | 0.03                  | 0.08 | 0.05 | -                     | -    | -    | -                     | -    | -    | -                     | -    | -    | 0.03             | 0.19             | 0.12             |
|              | 4th      | 45.3   | 0.42   | 0.04                  | 0.26 | 0.19 | 0.16                  | 0.26 | 0.21 | 0.14                  | 0.20 | 0.17 | 0.13                  | 0.19 | 0.16 | 0.05                  | 0.18 | 0.11 | 0.04                  | 0.06 | 0.05 | -                     | -    | -    | -                     | -    | -    | 0.04             | 0.26             | 0.15             |
|              | 5th      | 60.1   | 0.56   | 0.04                  | 0.31 | 0.17 | 0.06                  | 0.35 | 0.23 | 0.13                  | 0.23 | 0.17 | 0.15                  | 0.22 | 0.20 | 0.07                  | 0.24 | 0.16 | 0.08                  | 0.10 | 0.09 | -                     | -    | -    | -                     | -    | -    | 0.04             | 0.35             | 0.17             |
| M8-FA-16-(C) | 6th      | 75.3   | 0.70   | 0.04                  | 0.37 | 0.20 | 0.10                  | 0.37 | 0.26 | 0.13                  | 0.27 | 0.22 | 0.03                  | 0.26 | 0.15 | 0.08                  | 0.30 | 0.19 | 0.10                  | 0.13 | 0.11 | -                     | -    | -    | -                     | -    | -    | 0.03             | 0.37             | 0.19             |
|              | 7th      | 95.6   | 0.89   | 0.09                  | 0.43 | 0.25 | 0.10                  | 0.39 | 0.23 | 0.20                  | 0.34 | 0.27 | 0.12                  | 0.28 | 0.18 | 0.03                  | 0.36 | 0.18 | 0.07                  | 0.15 | 0.12 | -                     | -    | -    | -                     | -    | -    | 0.03             | 0.43             | 0.21             |
|              | 1st      | 16.5   | 0.15   | 0.02                  | 0.06 | 0.04 | 0.04                  | 0.04 | 0.04 | 0.05                  | 0.05 | 0.05 | -                     | -    | -    | -                     | -    | -    | -                     | -    | -    | -                     | -    | -    | -                     | -    | -    | 0.02             | 0.06             | 0.04             |
|              | 2nd      | 17.9   | 0.17   | 0.03                  | 0.07 | 0.05 | 0.04                  | 0.05 | 0.05 | 0.04                  | 0.06 | 0.05 | 0.04                  | 0.04 | 0.04 | 0.04                  | 0.04 | -    | -                     | -    | -    | -                     | -    | -    | -                     | -    | -    | 0.03             | 0.07             | 0.04             |
|              | 3rd      | 22.7   | 0.21   | 0.05                  | 0.10 | 0.07 | 0.05                  | 0.08 | 0.06 | 0.05                  | 0.07 | 0.06 | 0.04                  | 0.08 | 0.05 | 0.03                  | 0.05 | 0.04 | 0.03                  | 0.04 | 0.04 | -                     | -    | -    | -                     | -    | -    | 0.03             | 0.10             | 0.05             |
|              | 4th      | 38.0   | 0.35   | 0.09                  | 0.14 | 0.12 | 0.09                  | 0.15 | 0.13 | 0.06                  | 0.12 | 0.10 | 0.05                  | 0.19 | 0.10 | 0.05                  | 0.12 | 0.08 | 0.05                  | 0.09 | 0.07 | -                     | -    | -    | -                     | -    | -    | 0.05             | 0.19             | 0.10             |
|              | 5th      | 52.0   | 0.48   | 0.14                  | 0.19 | 0.17 | 0.14                  | 0.21 | 0.18 | 0.09                  | 0.17 | 0.14 | 0.05                  | 0.25 | 0.14 | 0.04                  | 0.21 | 0.11 | 0.08                  | 0.15 | 0.12 | -                     | -    | -    | -                     | -    | -    | 0.04             | 0.25             | 0.14             |
|              | 6th      | 67.5   | 0.63   | 0.13                  | 0.30 | 0.20 | 0.06                  | 0.25 | 0.16 | 0.04                  | 0.18 | 0.11 | 0.05                  | 0.33 | 0.17 | 0.04                  | 0.26 | 0.16 | 0.07                  | 0.22 | 0.13 | -                     | -    | -    | -                     | -    | -    | 0.04             | 0.33             | 0.15             |
|              | 7th      | 82.2   | 0.77   | 0.05                  | 0.36 | 0.19 | 0.04                  | 0.29 | 0.15 | 0.05                  | 0.19 | 0.12 | 0.06                  | 0.34 | 0.19 | 0.05                  | 0.33 | 0.17 | 0.08                  | 0.24 | 0.15 | -                     | -    | -    | -                     | -    | -    | 0.04             | 0.36             | 0.16             |
| M8-FA-16-(D) | 8th      | 94.0   | 0.88   | 0.06                  | 0.37 | 0.22 | 0.06                  | 0.30 | 0.18 | 0.06                  | 0.20 | 0.15 | 0.11                  | 0.40 | 0.24 | 0.03                  | 0.35 | 0.19 | 0.07                  | 0.30 | 0.18 | -                     | -    | -    | -                     | -    | -    | 0.03             | 0.40             | 0.19             |
|              | 1st      | 18.2   | 0.17   | 0.03                  | 0.03 | 0.03 | 0.03                  | 0.05 | 0.04 | -                     | -    | -    | -                     | -    | -    | -                     | -    | -    | -                     | -    | -    | -                     | -    | -    | -                     | -    | -    | 0.03             | 0.05             | 0.03             |
|              | 2nd      | 19.3   | 0.18   | 0.03                  | 0.04 | 0.04 | 0.04                  | 0.06 | 0.05 | 0.03                  | 0.05 | 0.04 | 0.04                  | 0.05 | 0.04 | -                     | -    | -    | -                     | -    | -    | -                     | -    | -    | -                     | -    | -    | 0.03             | 0.06             | 0.04             |
|              | 3rd      | 22.3   | 0.21   | 0.05                  | 0.06 | 0.06 | 0.05                  | 0.07 | 0.06 | 0.05                  | 0.07 | 0.06 | 0.02                  | 0.11 | 0.06 | 0.04                  | 0.09 | 0.07 | -                     | -    | -    | -                     | -    | -    | -                     | -    | -    | 0.02             | 0.11             | 0.06             |
|              | 4th      | 33.8   | 0.31   | 0.07                  | 0.09 | 0.08 | 0.04                  | 0.12 | 0.07 | 0.10                  | 0.12 | 0.11 | 0.04                  | 0.13 | 0.10 | 0.08                  | 0.15 | 0.10 | 0.04                  | 0.06 | 0.05 | -                     | -    | -    | -                     | -    | -    | 0.04             | 0.15             | 0.09             |
|              | 5th      | 50.1   | 0.47   | 0.11                  | 0.14 | 0.12 | 0.03                  | 0.19 | 0.11 | 0.18                  | 0.21 | 0.20 | 0.08                  | 0.20 | 0.16 | 0.09                  | 0.19 | 0.15 | 0.07                  | 0.13 | 0.10 | -                     | -    | -    | -                     | -    | -    | 0.03             | 0.21             | 0.14             |
|              | 6th      | 57.3   | 0.53   | 0.12                  | 0.17 | 0.15 | 0.06                  | 0.21 | 0.14 | 0.21                  | 0.25 | 0.24 | 0.13                  | 0.21 | 0.17 | 0.09                  | 0.22 | 0.14 | 0.10                  | 0.14 | 0.12 | 0.03                  | 0.06 | 0.05 | -                     | -    | -    | 0.03             | 0.25             | 0.14             |
|              | 7th      | 72.4   | 0.67   | 0.15                  | 0.22 | 0.18 | 0.06                  | 0.25 | 0.16 | 0.25                  | 0.31 | 0.27 | 0.04                  | 0.24 | 0.19 | 0.16                  | 0.26 | 0.21 | 0.16                  | 0.24 | 0.19 | 0.05                  | 0.07 | 0.06 | -                     | -    | -    | 0.04             | 0.31             | 0.18             |
|              | 8th      | 87.1   | 0.81   | 0.08                  | 0.27 | 0.21 | 0.07                  | 0.31 | 0.18 | 0.30                  | 0.37 | 0.32 | 0.10                  | 0.25 | 0.19 | 0.04                  | 0.27 | 0.19 | 0.18                  | 0.28 | 0.24 | 0.06                  | 0.08 | 0.08 | -                     | -    | -    | 0.04             | 0.37             | 0.19             |
| M9-FA-10-(A) | 9th      | 98.0   | 0.91   | 0.04                  | 0.28 | 0.19 | 0.11                  | 0.33 | 0.22 | 0.04                  | 0.40 | 0.27 | 0.06                  | 0.26 | 0.17 | 0.05                  | 0.29 | 0.22 | 0.03                  | 0.32 | 0.19 | 0.06                  | 0.09 | 0.07 | -                     | -    | -    | 0.03             | 0.40             | 0.17             |
|              | 1st      | 9.3    | 0.22   | 0.06                  | 0.08 | 0.07 | 0.06                  | 0.11 | 0.07 | -                     | -    | -    | -                     | -    | -    | -                     | -    | -    | -                     | -    | -    | -                     | -    | -    | -                     | -    | -    | 0.06             | 0.11             | 0.07             |
|              | 2nd      | 11.7   | 0.28   | 0.07                  | 0.12 | 0.10 | 0.06                  | 0.16 | 0.11 | 0.06                  | 0.08 | 0.07 | -                     | -    | -    | -                     | -    | -    | -                     | -    | -    | -                     | -    | -    | -                     | -    | -    | 0.06             | 0.16             | 0.09             |
|              | 3rd      | 13.5   | 0.32   | 0.08                  | 0.16 | 0.11 | 0.05                  | 0.17 | 0.11 | 0.06                  | 0.13 | 0.09 | 0.04                  | 0.07 | 0.05 | -                     | -    | -    | -                     | -    | -    | -                     | -    | -    | -                     | -    | -    | 0.04             | 0.17             | 0.09             |
|              | 4th      | 17.2   | 0.41   | 0.05                  | 0.21 | 0.13 | 0.05                  | 0.27 | 0.14 | 0.06                  | 0.19 | 0.13 | 0.00                  | 0.10 | 0.05 | 0.06                  | 0.09 | 0.08 | -                     | -    | -    | -                     | -    | -    | -                     | -    | -    | 0.00             | 0.27             | 0.11             |
|              | 5th      | 21.0   | 0.50   | 0.06                  | 0.24 | 0.14 | 0.05                  | 0.36 | 0.18 | 0.10                  | 0.22 | 0.17 | 0.07                  | 0.14 | 0.11 | 0.07                  | 0.14 | 0.11 | 0.08                  | 0.12 | 0.10 | -                     | -    | -    | -                     | -    | -    | 0.05             | 0.36             | 0.13             |
|              | 6th      | 31.0   | 0.74   | 0.08                  | 0.36 | 0.22 | 0.06                  | 0.46 | 0.22 | 0.09                  | 0.36 | 0.22 | 0.08                  | 0.26 | 0.18 | 0.04                  | 0.24 | 0.14 | 0.14                  | 0.22 | 0.17 | -                     | -    | -    | -                     | -    | -    | 0.04             | 0.46             | 0.19             |
|              | 7th      | 41.6   | 0.99   | 0.08                  | 0.46 | 0.27 | 0.10                  | 0.69 | 0.30 | 0.09                  | 0.47 | 0.27 | 0.08                  | 0.32 | 0.21 | 0.04                  | 0.34 | 0.19 | 0.22                  | 0.30 | 0.25 | -                     | -    | -    | -                     | -    | -    | 0.04             | 0.69             | 0.25             |
| M9-FA-10-(B) | 1st      | 9.0    | 0.22   | 0.05                  | 0.06 | 0.06 | -                     | -    | -    | -                     | -    | -    | -                     | -    | -    | -                     | -    | -    | -                     | -    | -    | -                     | -    | -    | -                     | -    | -    | 0.05             | 0.06             | 0.06             |
|              | 2nd      | 11.3   | 0.27   | 0.06                  | 0.08 | 0.07 | 0.03                  | 0.05 | 0.04 | -                     | -    | -    | -                     | -    | -    | -                     | -    | -    | -                     | -    | -    | -                     | -    | -    | -                     | -    | -    | 0.03             | 0.08             | 0.05             |
|              | 3rd      | 13.0   | 0.31   | 0.05                  | 0.09 | 0.07 | 0.04                  | 0.06 | 0.05 | 0.04                  | 0.08 | 0.06 | 0.05                  | 0.10 | 0.07 | 0.08                  | 0.14 | 0.11 | 0.05                  | 0.15 | 0.09 | -                     | -    | -    | -                     | -    | -    | 0.04             | 0.15             | 0.08             |
|              | 4th      | 17.3   | 0.41   | 0.05                  | 0.10 | 0.07 | 0.04                  | 0.13 | 0.06 | 0.05                  | 0.11 | 0.08 | 0.05                  | 0.19 | 0.09 | 0.19                  | 0.25 | 0.23 | 0.07                  | 0.21 | 0.14 | 0.10                  | 0.12 | 0.11 | -                     | -    | -    | 0.04             | 0.25             | 0.11             |

| Spec. ID.    | Sta. NO. | P (kN) | (σ/Fy) | 1 <sup>st</sup> crack |      |      | 2 <sup>nd</sup> crack |      |      | 3 <sup>rd</sup> crack |      |      | 4 <sup>th</sup> crack |      |      | 5 <sup>th</sup> crack |      |      | 6 <sup>th</sup> crack |      |      | 7 <sup>th</sup> crack |      |      | 8 <sup>th</sup> crack |      |      | Min. crack width | Max. crack width | Ave. crack width |      |
|--------------|----------|--------|--------|-----------------------|------|------|-----------------------|------|------|-----------------------|------|------|-----------------------|------|------|-----------------------|------|------|-----------------------|------|------|-----------------------|------|------|-----------------------|------|------|------------------|------------------|------------------|------|
|              |          |        |        | Min.                  | Max. | Ave. |                  |                  |                  |      |
| M9-FA-10-(C) | 5th      | 27.1   | 0.64   | 0.06                  | 0.11 | 0.07 | 0.08                  | 0.26 | 0.15 | 0.09                  | 0.12 | 0.10 | 0.06                  | 0.34 | 0.20 | 0.30                  | 0.38 | 0.35 | 0.11                  | 0.26 | 0.18 | 0.16                  | 0.29 | 0.22 | -                     | -    | -    | 0.06             | 0.38             | 0.18             |      |
|              | 6th      | 37.0   | 0.88   | 0.07                  | 0.14 | 0.09 | 0.25                  | 0.30 | 0.27 | 0.11                  | 0.16 | 0.14 | 0.15                  | 0.43 | 0.26 | 0.41                  | 0.48 | 0.44 | 0.06                  | 0.35 | 0.18 | 0.30                  | 0.37 | 0.33 | -                     | -    | -    | 0.06             | 0.48             | 0.25             |      |
|              | 7th      | 44.0   | 1.05   | 0.08                  | 0.15 | 0.11 | 0.05                  | 0.36 | 0.27 | 0.16                  | 0.20 | 0.18 | 0.23                  | 0.51 | 0.33 | 0.05                  | 0.58 | 0.41 | 0.15                  | 0.36 | 0.24 | 0.33                  | 0.42 | 0.38 | -                     | -    | -    | 0.05             | 0.58             | 0.28             |      |
|              | 1st      | 9.2    | 0.22   | 0.05                  | 0.05 | 0.05 | 0.06                  | 0.07 | 0.07 | 0.06                  | 0.11 | 0.09 | -                     | -    | -    | -                     | -    | -    | -                     | -    | -    | -                     | -    | -    | -                     | -    | -    | -                | 0.05             | 0.11             | 0.07 |
|              | 2nd      | 11.7   | 0.28   | 0.07                  | 0.12 | 0.10 | 0.06                  | 0.11 | 0.08 | 0.11                  | 0.18 | 0.14 | 0.05                  | 0.05 | 0.05 | 0.05                  | 0.06 | 0.05 | -                     | -    | -    | -                     | -    | -    | -                     | -    | -    | -                | 0.05             | 0.18             | 0.08 |
|              | 3rd      | 16.6   | 0.40   | 0.12                  | 0.19 | 0.16 | 0.13                  | 0.23 | 0.16 | 0.13                  | 0.26 | 0.18 | 0.09                  | 0.12 | 0.10 | 0.11                  | 0.17 | 0.13 | 0.05                  | 0.05 | 0.05 | -                     | -    | -    | -                     | -    | -    | -                | 0.05             | 0.26             | 0.13 |
|              | 4th      | 26.7   | 0.64   | 0.19                  | 0.26 | 0.23 | 0.30                  | 0.37 | 0.33 | 0.16                  | 0.42 | 0.26 | 0.19                  | 0.26 | 0.22 | 0.17                  | 0.35 | 0.26 | 0.07                  | 0.25 | 0.17 | -                     | -    | -    | -                     | -    | -    | -                | 0.07             | 0.42             | 0.25 |
| M9-FA-10-(D) | 5th      | 36.6   | 0.87   | 0.17                  | 0.33 | 0.28 | 0.06                  | 0.50 | 0.33 | 0.08                  | 0.54 | 0.31 | 0.06                  | 0.36 | 0.28 | 0.08                  | 0.47 | 0.27 | 0.12                  | 0.35 | 0.23 | -                     | -    | -    | -                     | -    | -    | -                | 0.06             | 0.54             | 0.28 |
|              | 6th      | 41.0   | 0.98   | 0.23                  | 0.37 | 0.32 | 0.04                  | 0.51 | 0.27 | 0.09                  | 0.71 | 0.35 | 0.09                  | 0.39 | 0.29 | 0.08                  | 0.52 | 0.29 | 0.12                  | 0.41 | 0.27 | -                     | -    | -    | -                     | -    | -    | -                | 0.04             | 0.71             | 0.30 |
|              | 1st      | 7.6    | 0.18   | 0.05                  | 0.07 | 0.06 | 0.06                  | 0.07 | 0.07 | -                     | -    | -    | -                     | -    | -    | -                     | -    | -    | -                     | -    | -    | -                     | -    | -    | -                     | -    | -    | -                | 0.05             | 0.07             | 0.06 |
|              | 2nd      | 9.6    | 0.23   | 0.10                  | 0.15 | 0.13 | 0.10                  | 0.15 | 0.13 | 0.04                  | 0.08 | 0.06 | -                     | -    | -    | -                     | -    | -    | -                     | -    | -    | -                     | -    | -    | -                     | -    | -    | -                | 0.04             | 0.15             | 0.11 |
|              | 3rd      | 18.3   | 0.44   | 0.27                  | 0.38 | 0.34 | 0.23                  | 0.38 | 0.29 | 0.06                  | 0.28 | 0.18 | 0.06                  | 0.11 | 0.08 | -                     | -    | -    | -                     | -    | -    | -                     | -    | -    | -                     | -    | -    | -                | 0.06             | 0.38             | 0.22 |
|              | 4th      | 23.9   | 0.57   | 0.43                  | 0.49 | 0.46 | 0.37                  | 0.55 | 0.46 | 0.06                  | 0.39 | 0.28 | 0.07                  | 0.12 | 0.09 | 0.08                  | 0.09 | 0.08 | 0.06                  | 0.11 | 0.09 | -                     | -    | -    | -                     | -    | -    | -                | 0.06             | 0.55             | 0.24 |
|              | 5th      | 34.0   | 0.81   | 0.12                  | 0.72 | 0.58 | 0.09                  | 0.66 | 0.47 | 0.05                  | 0.50 | 0.39 | 0.13                  | 0.19 | 0.11 | 0.06                  | 0.22 | 0.14 | 0.15                  | 0.20 | 0.18 | -                     | -    | -    | -                     | -    | -    | -                | 0.05             | 0.72             | 0.31 |
| M9-FA-12-(A) | 6th      | 42.1   | 1.00   | 0.13                  | 0.77 | 0.63 | 0.09                  | 0.78 | 0.53 | 0.09                  | 0.63 | 0.09 | 0.05                  | 0.30 | 0.17 | 0.07                  | 0.34 | 0.19 | 0.22                  | 0.26 | 0.24 | -                     | -    | -    | -                     | -    | -    | -                | 0.05             | 0.78             | 0.31 |
|              | 1st      | 11.8   | 0.19   | 0.05                  | 0.06 | 0.05 | -                     | -    | -    | -                     | -    | -    | -                     | -    | -    | -                     | -    | -    | -                     | -    | -    | -                     | -    | -    | -                     | -    | -    | -                | 0.05             | 0.06             | 0.05 |
|              | 2nd      | 12.4   | 0.21   | 0.03                  | 0.07 | 0.06 | 0.05                  | 0.05 | 0.05 | -                     | -    | -    | -                     | -    | -    | -                     | -    | -    | -                     | -    | -    | -                     | -    | -    | -                     | -    | -    | -                | 0.03             | 0.07             | 0.05 |
|              | 3rd      | 14.5   | 0.24   | 0.06                  | 0.11 | 0.08 | 0.06                  | 0.07 | 0.06 | 0.03                  | 0.04 | 0.04 | 0.04                  | 0.06 | 0.05 | -                     | -    | -    | -                     | -    | -    | -                     | -    | -    | -                     | -    | -    | -                | 0.03             | 0.11             | 0.06 |
|              | 4th      | 15.9   | 0.26   | 0.07                  | 0.14 | 0.10 | 0.06                  | 0.08 | 0.07 | 0.03                  | 0.05 | 0.04 | 0.04                  | 0.07 | 0.06 | 0.05                  | 0.07 | 0.06 | -                     | -    | -    | -                     | -    | -    | -                     | -    | -    | -                | 0.03             | 0.14             | 0.07 |
|              | 5th      | 19.1   | 0.32   | 0.09                  | 0.16 | 0.12 | 0.03                  | 0.12 | 0.07 | 0.05                  | 0.09 | 0.06 | 0.05                  | 0.10 | 0.07 | 0.07                  | 0.11 | 0.09 | 0.06                  | 0.06 | 0.06 | -                     | -    | -    | -                     | -    | -    | -                | 0.03             | 0.16             | 0.08 |
|              | 6th      | 23.1   | 0.38   | 0.05                  | 0.22 | 0.13 | 0.04                  | 0.16 | 0.11 | 0.07                  | 0.12 | 0.09 | 0.05                  | 0.14 | 0.09 | 0.10                  | 0.17 | 0.13 | 0.06                  | 0.07 | 0.06 | 0.05                  | 0.07 | 0.06 | -                     | -    | -    | -                | 0.04             | 0.22             | 0.10 |
| M9-FA-12-(B) | 7th      | 33.1   | 0.55   | 0.04                  | 0.31 | 0.18 | 0.07                  | 0.25 | 0.15 | 0.11                  | 0.20 | 0.16 | 0.05                  | 0.21 | 0.13 | 0.17                  | 0.23 | 0.19 | 0.08                  | 0.09 | 0.09 | 0.06                  | 0.17 | 0.12 | -                     | -    | -    | -                | 0.04             | 0.31             | 0.15 |
|              | 8th      | 43.1   | 0.71   | 0.05                  | 0.36 | 0.24 | 0.05                  | 0.28 | 0.18 | 0.05                  | 0.26 | 0.20 | 0.06                  | 0.32 | 0.20 | 0.20                  | 0.34 | 0.26 | 0.10                  | 0.16 | 0.13 | 0.07                  | 0.24 | 0.13 | -                     | -    | -    | -                | 0.05             | 0.36             | 0.19 |
|              | 9th      | 55.9   | 0.92   | 0.04                  | 0.41 | 0.29 | 0.04                  | 0.35 | 0.22 | 0.09                  | 0.36 | 0.22 | 0.08                  | 0.36 | 0.24 | 0.05                  | 0.52 | 0.24 | 0.05                  | 0.23 | 0.13 | 0.06                  | 0.34 | 0.23 | -                     | -    | -    | -                | 0.04             | 0.52             | 0.22 |
|              | 1st      | 12.8   | 0.21   | 0.05                  | 0.05 | 0.05 | 0.05                  | 0.07 | 0.06 | 0.05                  | 0.06 | 0.05 | -                     | -    | -    | -                     | -    | -    | -                     | -    | -    | -                     | -    | -    | -                     | -    | -    | -                | 0.05             | 0.07             | 0.05 |
|              | 2nd      | 15.0   | 0.25   | 0.03                  | 0.07 | 0.05 | 0.06                  | 0.09 | 0.07 | 0.05                  | 0.08 | 0.06 | 0.03                  | 0.06 | 0.04 | -                     | -    | -    | -                     | -    | -    | -                     | -    | -    | -                     | -    | -    | -                | 0.03             | 0.09             | 0.06 |
|              | 3rd      | 18.2   | 0.30   | 0.04                  | 0.09 | 0.07 | 0.07                  | 0.12 | 0.09 | 0.06                  | 0.11 | 0.08 | 0.04                  | 0.09 | 0.06 | 0.04                  | 0.06 | 0.05 | 0.07                  | 0.08 | 0.07 | -                     | -    | -    | -                     | -    | -    | -                | 0.04             | 0.12             | 0.07 |
|              | 4th      | 27.1   | 0.45   | 0.06                  | 0.12 | 0.08 | 0.06                  | 0.18 | 0.14 | 0.10                  | 0.21 | 0.16 | 0.03                  | 0.19 | 0.11 | 0.12                  | 0.17 | 0.14 | 0.08                  | 0.15 | 0.11 | -                     | -    | -    | -                     | -    | -    | -                | 0.03             | 0.21             | 0.12 |
| M9-FA-16-(A) | 5th      | 37.0   | 0.61   | 0.06                  | 0.19 | 0.13 | 0.14                  | 0.27 | 0.20 | 0.07                  | 0.29 | 0.18 | 0.03                  | 0.23 | 0.12 | 0.15                  | 0.21 | 0.18 | 0.10                  | 0.18 | 0.14 | -                     | -    | -    | -                     | -    | -    | -                | 0.03             | 0.29             | 0.16 |
|              | 6th      | 47.2   | 0.78   | 0.05                  | 0.27 | 0.14 | 0.08                  | 0.32 | 0.19 | 0.08                  | 0.40 | 0.24 | 0.05                  | 0.27 | 0.15 | 0.17                  | 0.29 | 0.23 | 0.14                  | 0.27 | 0.23 | -                     | -    | -    | -                     | -    | -    | -                | 0.05             | 0.40             | 0.20 |
|              | 7th      | 55.6   | 0.92   | 0.06                  | 0.35 | 0.20 | 0.06                  | 0.35 | 0.20 | 0.05                  | 0.54 | 0.29 | 0.04                  | 0.31 | 0.14 | 0.21                  | 0.35 | 0.27 | 0.15                  | 0.33 | 0.29 | -                     | -    | -    | -                     | -    | -    | -                | 0.04             | 0.54             | 0.23 |
|              | 1st      | 12.4   | 0.12   | 0.02                  | 0.10 | 0.05 | -                     | -    | -    | -                     | -    | -    | -                     | -    | -    | -                     | -    | -    | -                     | -    | -    | -                     | -    | -    | -                     | -    | -    | -                | 0.02             | 0.10             | 0.05 |
|              | 2nd      | 14.2   | 0.13   | 0.06                  | 0.11 | 0.08 | 0.04                  | 0.08 | 0.06 | -                     | -    | -    | -                     | -    | -    | -                     | -    | -    | -                     | -    | -    | -                     | -    | -    | -                     | -    | -    | -                | 0.04             | 0.11             | 0.07 |
|              | 3rd      | 18.4   | 0.17   | 0.05                  | 0.15 | 0.09 | 0.05                  | 0.12 | 0.07 | 0.04                  | 0.06 | 0.05 | 0.06                  | 0.07 | 0.07 | -                     | -    | -    | -                     | -    | -    | -                     | -    | -    | -                     | -    | -    | -                | 0.04             | 0.15             | 0.07 |
|              | 4th      | 31.3   | 0.29   | 0.09                  | 0.20 | 0.13 | 0.04                  | 0.24 | 0.15 | 0.05                  | 0.15 | 0.10 | 0.06                  | 0.14 | 0.09 | 0.08                  | 0.08 | 0.08 | -                     | -    | -    | -                     | -    | -    | -                     | -    | -    | -                | 0.04             | 0.24             | 0.11 |
| M9-FA-16-(A) | 5th      | 41.3   | 0.38   | 0.09                  | 0.26 | 0.18 | 0.09                  | 0.29 | 0.19 | 0.06                  | 0.21 | 0.14 | 0.05                  | 0.19 | 0.11 | 0.08                  | 0.13 | 0.11 | 0.08                  | 0.11 | 0.09 | -                     | -    | -    | -                     | -    | -    | -                | 0.05             | 0.29             | 0.14 |
|              | 6th      | 50.2   | 0.47   | 0.10                  | 0.30 | 0.19 | 0.06                  | 0.35 | 0.21 | 0.08                  | 0.23 | 0.14 | 0.04                  | 0.20 | 0.11 | 0.10                  | 0.17 | 0.13 | 0.10                  | 0.13 | 0.11 | 0.04                  | 0.10 | 0.06 | -                     | -    | -    | -                | 0.04             | 0.35             | 0.14 |
|              | 7th      | 64.5   | 0.60   | 0.12                  | 0.34 | 0.20 | 0.13                  | 0.42 | 0.26 | 0.07                  | 0.32 | 0.21 | 0.04                  | 0.22 | 0.17 | 0.14                  | 0.21 | 0.18 | 0.07                  | 0.14 | 0.11 | 0.10                  | 0.17 | 0.13 | -                     | -    | -    | -                | 0.04             | 0.42             | 0.18 |

| Spec. ID.     | Sta. NO. | P (kN) | (σ/Fy) | 1 <sup>st</sup> crack |      |      | 2 <sup>nd</sup> crack |      |      | 3 <sup>rd</sup> crack |      |      | 4 <sup>th</sup> crack |      |      | 5 <sup>th</sup> crack |      |      | 6 <sup>th</sup> crack |      |      | 7 <sup>th</sup> crack |      |      | 8 <sup>th</sup> crack |      |      | Min. crack width | Max. crack width | Ave. crack width |
|---------------|----------|--------|--------|-----------------------|------|------|-----------------------|------|------|-----------------------|------|------|-----------------------|------|------|-----------------------|------|------|-----------------------|------|------|-----------------------|------|------|-----------------------|------|------|------------------|------------------|------------------|
|               |          |        |        | Min.                  | Max. | Ave. | Min.             | Max.             | Ave.             |
| M9-FA-16-(B)  | 8th      | 80.1   | 0.75   | 0.12                  | 0.40 | 0.26 | 0.14                  | 0.43 | 0.29 | 0.10                  | 0.35 | 0.23 | 0.04                  | 0.29 | 0.19 | 0.14                  | 0.22 | 0.19 | 0.04                  | 0.23 | 0.13 | 0.09                  | 0.25 | 0.17 | -                     | -    | -    | 0.04             | 0.43             | 0.21             |
|               | 9th      | 98.6   | 0.92   | 0.05                  | 0.42 | 0.25 | 0.06                  | 0.45 | 0.31 | 0.05                  | 0.39 | 0.23 | 0.05                  | 0.30 | 0.21 | 0.06                  | 0.23 | 0.18 | 0.07                  | 0.24 | 0.15 | 0.10                  | 0.34 | 0.23 | -                     | -    | -    | 0.05             | 0.45             | 0.22             |
|               | 1st      | 24.9   | 0.23   | 0.04                  | 0.08 | 0.06 | -                     | -    | -    | -                     | -    | -    | -                     | -    | -    | -                     | -    | -    | -                     | -    | -    | -                     | -    | -    | -                     | -    | -    | 0.04             | 0.08             | 0.06             |
|               | 2nd      | 31.3   | 0.29   | 0.04                  | 0.11 | 0.08 | 0.06                  | 0.07 | 0.07 | 0.07                  | 0.09 | 0.08 | 0.05                  | 0.10 | 0.08 | 0.05                  | 0.08 | 0.07 | -                     | -    | -    | -                     | -    | -    | -                     | -    | -    | 0.04             | 0.11             | 0.07             |
|               | 3rd      | 34.8   | 0.32   | 0.09                  | 0.13 | 0.10 | 0.04                  | 0.08 | 0.06 | 0.07                  | 0.10 | 0.09 | 0.05                  | 0.12 | 0.09 | 0.06                  | 0.09 | 0.07 | 0.05                  | 0.06 | 0.05 | -                     | -    | -    | -                     | -    | -    | 0.04             | 0.13             | 0.08             |
|               | 4th      | 39.3   | 0.37   | 0.11                  | 0.14 | 0.12 | 0.06                  | 0.09 | 0.07 | 0.05                  | 0.12 | 0.09 | 0.08                  | 0.13 | 0.11 | 0.06                  | 0.11 | 0.08 | 0.05                  | 0.08 | 0.06 | 0.07                  | 0.07 | 0.07 | -                     | -    | -    | 0.05             | 0.14             | 0.09             |
|               | 5th      | 55.0   | 0.51   | 0.13                  | 0.18 | 0.16 | 0.06                  | 0.11 | 0.09 | 0.10                  | 0.18 | 0.14 | 0.10                  | 0.16 | 0.13 | 0.03                  | 0.18 | 0.11 | 0.08                  | 0.15 | 0.10 | 0.06                  | 0.12 | 0.10 | 0.07                  | 0.11 | 0.09 | 0.03             | 0.18             | 0.11             |
|               | 6th      | 70.0   | 0.65   | 0.15                  | 0.24 | 0.19 | 0.06                  | 0.15 | 0.11 | 0.10                  | 0.20 | 0.14 | 0.08                  | 0.18 | 0.16 | 0.05                  | 0.21 | 0.15 | 0.05                  | 0.18 | 0.13 | 0.08                  | 0.17 | 0.13 | 0.05                  | 0.14 | 0.11 | 0.05             | 0.24             | 0.14             |
|               | 7th      | 85.4   | 0.80   | 0.07                  | 0.26 | 0.19 | 0.09                  | 0.16 | 0.13 | 0.04                  | 0.22 | 0.13 | 0.06                  | 0.24 | 0.18 | 0.05                  | 0.22 | 0.17 | 0.08                  | 0.21 | 0.15 | 0.06                  | 0.22 | 0.14 | 0.05                  | 0.20 | 0.13 | 0.04             | 0.26             | 0.15             |
|               | 8th      | 99.0   | 0.92   | 0.09                  | 0.34 | 0.27 | 0.08                  | 0.18 | 0.14 | 0.07                  | 0.33 | 0.19 | 0.06                  | 0.32 | 0.18 | 0.06                  | 0.25 | 0.17 | 0.13                  | 0.23 | 0.17 | 0.06                  | 0.27 | 0.15 | 0.04                  | 0.24 | 0.15 | 0.04             | 0.34             | 0.18             |
| M9-FA-16-(C)  | 1st      | 18.7   | 0.17   | 0.03                  | 0.07 | 0.05 | 0.04                  | 0.05 | 0.05 | -                     | -    | -    | -                     | -    | -    | -                     | -    | -    | -                     | -    | -    | -                     | -    | -    | -                     | -    | -    | 0.03             | 0.07             | 0.05             |
|               | 2nd      | 20.8   | 0.19   | 0.04                  | 0.08 | 0.06 | 0.05                  | 0.06 | 0.05 | 0.03                  | 0.06 | 0.05 | -                     | -    | -    | -                     | -    | -    | -                     | -    | -    | -                     | -    | -    | -                     | -    | -    | 0.03             | 0.08             | 0.05             |
|               | 3rd      | 23.0   | 0.21   | 0.06                  | 0.09 | 0.07 | 0.04                  | 0.07 | 0.06 | 0.04                  | 0.07 | 0.06 | 0.04                  | 0.06 | 0.05 | -                     | -    | -    | -                     | -    | -    | -                     | -    | -    | -                     | -    | -    | 0.04             | 0.09             | 0.06             |
|               | 4th      | 27.3   | 0.25   | 0.09                  | 0.10 | 0.09 | 0.04                  | 0.10 | 0.08 | 0.04                  | 0.08 | 0.07 | 0.05                  | 0.08 | 0.06 | 0.04                  | 0.05 | 0.05 | -                     | -    | -    | -                     | -    | -    | -                     | -    | -    | 0.04             | 0.10             | 0.07             |
|               | 5th      | 42.1   | 0.39   | 0.15                  | 0.18 | 0.16 | 0.07                  | 0.20 | 0.13 | 0.09                  | 0.17 | 0.13 | 0.05                  | 0.14 | 0.09 | 0.05                  | 0.07 | 0.06 | -                     | -    | -    | -                     | -    | -    | -                     | -    | -    | 0.05             | 0.20             | 0.12             |
|               | 6th      | 57.0   | 0.53   | 0.18                  | 0.23 | 0.21 | 0.08                  | 0.23 | 0.16 | 0.03                  | 0.24 | 0.14 | 0.09                  | 0.21 | 0.13 | 0.04                  | 0.08 | 0.06 | 0.03                  | 0.09 | 0.07 | 0.04                  | 0.12 | 0.08 | -                     | -    | -    | 0.03             | 0.24             | 0.12             |
|               | 7th      | 72.3   | 0.67   | 0.20                  | 0.29 | 0.26 | 0.07                  | 0.27 | 0.18 | 0.18                  | 0.29 | 0.23 | 0.05                  | 0.25 | 0.15 | 0.04                  | 0.11 | 0.07 | 0.05                  | 0.14 | 0.09 | 0.05                  | 0.19 | 0.11 | -                     | -    | -    | 0.04             | 0.29             | 0.16             |
|               | 8th      | 87.1   | 0.81   | 0.28                  | 0.35 | 0.30 | 0.11                  | 0.31 | 0.19 | 0.04                  | 0.30 | 0.16 | 0.06                  | 0.26 | 0.17 | 0.05                  | 0.16 | 0.10 | 0.04                  | 0.18 | 0.11 | 0.07                  | 0.22 | 0.14 | -                     | -    | -    | 0.04             | 0.35             | 0.17             |
|               | 9th      | 96.0   | 0.89   | 0.26                  | 0.46 | 0.36 | 0.04                  | 0.35 | 0.20 | 0.06                  | 0.33 | 0.18 | 0.09                  | 0.28 | 0.20 | 0.06                  | 0.17 | 0.10 | 0.06                  | 0.20 | 0.12 | 0.05                  | 0.28 | 0.17 | -                     | -    | -    | 0.04             | 0.46             | 0.19             |
| M9-FA-16-(D)  | 1st      | 17.8   | 0.17   | 0.02                  | 0.02 | 0.02 | 0.04                  | 0.05 | 0.04 | -                     | -    | -    | -                     | -    | -    | -                     | -    | -    | -                     | -    | -    | -                     | -    | -    | -                     | -    | -    | 0.02             | 0.05             | 0.03             |
|               | 2nd      | 23.0   | 0.21   | 0.03                  | 0.07 | 0.05 | 0.06                  | 0.06 | 0.06 | 0.03                  | 0.04 | 0.03 | -                     | -    | -    | -                     | -    | -    | -                     | -    | -    | -                     | -    | -    | -                     | -    | -    | 0.03             | 0.07             | 0.05             |
|               | 3rd      | 24.1   | 0.22   | 0.04                  | 0.08 | 0.06 | 0.04                  | 0.09 | 0.06 | 0.04                  | 0.05 | 0.04 | 0.04                  | 0.10 | 0.07 | 0.04                  | 0.05 | 0.04 | -                     | -    | -    | -                     | -    | -    | -                     | -    | -    | 0.04             | 0.10             | 0.06             |
|               | 4th      | 27.3   | 0.25   | 0.03                  | 0.09 | 0.06 | 0.07                  | 0.08 | 0.07 | 0.06                  | 0.07 | 0.06 | 0.06                  | 0.13 | 0.09 | 0.05                  | 0.08 | 0.06 | 0.05                  | 0.09 | 0.07 | -                     | -    | -    | -                     | -    | -    | 0.03             | 0.13             | 0.07             |
|               | 5th      | 42.1   | 0.39   | 0.10                  | 0.17 | 0.12 | 0.05                  | 0.17 | 0.11 | 0.06                  | 0.14 | 0.10 | 0.10                  | 0.19 | 0.15 | 0.05                  | 0.13 | 0.10 | 0.07                  | 0.13 | 0.10 | -                     | -    | -    | -                     | -    | -    | 0.05             | 0.19             | 0.11             |
|               | 6th      | 57.1   | 0.53   | 0.06                  | 0.23 | 0.13 | 0.05                  | 0.22 | 0.15 | 0.05                  | 0.15 | 0.10 | 0.18                  | 0.25 | 0.21 | 0.03                  | 0.20 | 0.12 | 0.05                  | 0.18 | 0.14 | -                     | -    | -    | -                     | -    | -    | 0.03             | 0.25             | 0.14             |
|               | 7th      | 72.2   | 0.67   | 0.04                  | 0.24 | 0.13 | 0.06                  | 0.29 | 0.19 | 0.05                  | 0.24 | 0.15 | 0.26                  | 0.31 | 0.28 | 0.03                  | 0.26 | 0.14 | 0.13                  | 0.21 | 0.18 | -                     | -    | -    | -                     | -    | -    | 0.03             | 0.31             | 0.18             |
|               | 8th      | 87.1   | 0.81   | 0.07                  | 0.26 | 0.16 | 0.10                  | 0.32 | 0.21 | 0.07                  | 0.27 | 0.16 | 0.27                  | 0.38 | 0.33 | 0.07                  | 0.29 | 0.17 | 0.06                  | 0.24 | 0.21 | -                     | -    | -    | -                     | -    | -    | 0.06             | 0.38             | 0.21             |
|               | 9th      | 91.3   | 0.85   | 0.10                  | 0.27 | 0.16 | 0.02                  | 0.33 | 0.17 | 0.04                  | 0.28 | 0.15 | 0.05                  | 0.41 | 0.23 | 0.05                  | 0.31 | 0.17 | 0.05                  | 0.28 | 0.21 | -                     | -    | -    | -                     | -    | -    | 0.02             | 0.41             | 0.18             |
| M1-OPC-12 (A) | 1st      | 10.5   | 0.17   | 0.07                  | 0.10 | 0.08 | -                     | -    | -    | -                     | -    | -    | -                     | -    | -    | -                     | -    | -    | -                     | -    | -    | -                     | -    | -    | -                     | -    | -    | 0.07             | 0.10             | 0.08             |
|               | 2nd      | 16.1   | 0.27   | 0.15                  | 0.19 | 0.17 | 0.07                  | 0.15 | 0.11 | -                     | -    | -    | -                     | -    | -    | -                     | -    | -    | -                     | -    | -    | -                     | -    | -    | -                     | -    | -    | 0.07             | 0.19             | 0.14             |
|               | 3rd      | 17.2   | 0.28   | 0.13                  | 0.20 | 0.17 | 0.10                  | 0.17 | 0.14 | 0.03                  | 0.19 | 0.12 | -                     | -    | -    | -                     | -    | -    | -                     | -    | -    | -                     | -    | -    | -                     | -    | -    | 0.03             | 0.20             | 0.14             |
|               | 4th      | 21.4   | 0.35   | 0.16                  | 0.24 | 0.21 | 0.15                  | 0.24 | 0.20 | 0.06                  | 0.26 | 0.16 | 0.12                  | 0.20 | 0.16 | -                     | -    | -    | -                     | -    | -    | -                     | -    | -    | -                     | -    | -    | 0.06             | 0.26             | 0.18             |
|               | 5th      | 35.1   | 0.58   | 0.05                  | 0.36 | 0.26 | 0.03                  | 0.36 | 0.24 | 0.04                  | 0.36 | 0.18 | 0.04                  | 0.34 | 0.23 | -                     | -    | -    | -                     | -    | -    | -                     | -    | -    | -                     | -    | -    | 0.03             | 0.36             | 0.21             |
|               | 6th      | 45.0   | 0.75   | 0.18                  | 0.43 | 0.26 | 0.04                  | 0.48 | 0.32 | 0.11                  | 0.37 | 0.25 | 0.10                  | 0.39 | 0.23 | -                     | -    | -    | -                     | -    | -    | -                     | -    | -    | -                     | -    | -    | 0.04             | 0.48             | 0.26             |
|               | 7th      | 49.9   | 0.83   | 0.22                  | 0.62 | 0.31 | 0.07                  | 0.51 | 0.37 | 0.18                  | 0.41 | 0.28 | 0.12                  | 0.86 | 0.38 | -                     | -    | -    | -                     | -    | -    | -                     | -    | -    | -                     | -    | -    | 0.07             | 0.86             | 0.36             |
| M1-OPC-12(B)  | 1st      | 15.1   | 0.25   | 0.03                  | 0.24 | 0.16 | -                     | -    | -    | -                     | -    | -    | -                     | -    | -    | -                     | -    | -    | -                     | -    | -    | -                     | -    | -    | -                     | -    | -    | 0.03             | 0.24             | 0.16             |
|               | 2nd      | 18.5   | 0.31   | 0.03                  | 0.30 | 0.18 | 0.04                  | 0.22 | 0.14 | -                     | -    | -    | -                     | -    | -    | -                     | -    | -    | -                     | -    | -    | -                     | -    | -    | -                     | -    | -    | 0.03             | 0.30             | 0.16             |
|               | 3rd      | 32.6   | 0.54   | 0.13                  | 0.34 | 0.23 | 0.19                  | 0.28 | 0.22 | -                     | -    | -    | -                     | -    | -    | -                     | -    | -    | -                     | -    | -    | -                     | -    | -    | -                     | -    | -    | 0.13             | 0.34             | 0.23             |

| Spec. ID.    | Sta. NO. | P (kN) | (σ/Fy) | 1 <sup>st</sup> crack |      |      | 2 <sup>nd</sup> crack |      |      | 3 <sup>rd</sup> crack |      |      | 4 <sup>th</sup> crack |      |      | 5 <sup>th</sup> crack |      |      | 6 <sup>th</sup> crack |      |      | 7 <sup>th</sup> crack |      |      | 8 <sup>th</sup> crack |      |      | Min. crack width | Max. crack width | Ave. crack width |
|--------------|----------|--------|--------|-----------------------|------|------|-----------------------|------|------|-----------------------|------|------|-----------------------|------|------|-----------------------|------|------|-----------------------|------|------|-----------------------|------|------|-----------------------|------|------|------------------|------------------|------------------|
|              |          |        |        | Min.                  | Max. | Ave. | Min.             | Max.             | Ave.             |
|              | 4th      | 42.7   | 0.71   | 0.25                  | 0.39 | 0.31 | 0.20                  | 0.45 | 0.31 | -                     | -    | -    | -                     | -    | -    | -                     | -    | -    | -                     | -    | -    | -                     | -    | -    | -                     | -    | -    | 0.20             | 0.45             | 0.31             |
|              | 5th      | 44.2   | 0.73   | 0.21                  | 0.38 | 0.29 | 0.20                  | 0.51 | 0.33 | 0.03                  | 0.24 | 0.14 | -                     | -    | -    | -                     | -    | -    | -                     | -    | -    | -                     | -    | -    | -                     | -    | -    | 0.03             | 0.51             | 0.25             |
|              | 6th      | 54.6   | 0.90   | 0.24                  | 0.91 | 0.38 | 0.23                  | 0.62 | 0.44 | 0.07                  | 0.37 | 0.22 | -                     | -    | -    | -                     | -    | -    | -                     | -    | -    | -                     | -    | -    | -                     | -    | -    | 0.07             | 0.91             | 0.35             |
| M2-OPC-16(A) | 1st      | 11.7   | 0.11   | 0.04                  | 0.06 | 0.05 | 0.04                  | 0.08 | 0.06 | -                     | -    | -    | -                     | -    | -    | -                     | -    | -    | -                     | -    | -    | -                     | -    | -    | -                     | -    | -    | 0.04             | 0.08             | 0.06             |
|              | 2nd      | 13.0   | 0.12   | 0.05                  | 0.08 | 0.06 | 0.05                  | 0.10 | 0.07 | 0.03                  | 0.04 | 0.04 | -                     | -    | -    | -                     | -    | -    | -                     | -    | -    | -                     | -    | -    | -                     | -    | -    | 0.03             | 0.10             | 0.06             |
|              | 3rd      | 17.5   | 0.16   | 0.07                  | 0.11 | 0.09 | 0.04                  | 0.14 | 0.09 | 0.07                  | 0.08 | 0.07 | 0.04                  | 0.08 | 0.06 | -                     | -    | -    | -                     | -    | -    | -                     | -    | -    | -                     | -    | -    | 0.04             | 0.14             | 0.08             |
|              | 4th      | 23.2   | 0.22   | 0.10                  | 0.14 | 0.12 | 0.03                  | 0.17 | 0.10 | 0.06                  | 0.10 | 0.09 | 0.05                  | 0.11 | 0.08 | 0.04                  | 0.08 | 0.07 | -                     | -    | -    | -                     | -    | -    | -                     | -    | -    | 0.03             | 0.17             | 0.09             |
|              | 5th      | 40.3   | 0.38   | 0.14                  | 0.20 | 0.17 | 0.02                  | 0.30 | 0.18 | 0.05                  | 0.17 | 0.12 | 0.05                  | 0.18 | 0.13 | 0.04                  | 0.17 | 0.11 | -                     | -    | -    | -                     | -    | -    | -                     | -    | -    | 0.02             | 0.30             | 0.14             |
|              | 6th      | 55.7   | 0.52   | 0.04                  | 0.23 | 0.14 | 0.04                  | 0.40 | 0.23 | 0.08                  | 0.26 | 0.16 | 0.04                  | 0.24 | 0.12 | 0.08                  | 0.22 | 0.16 | -                     | -    | -    | -                     | -    | -    | -                     | -    | -    | 0.04             | 0.40             | 0.16             |
|              | 7th      | 70.4   | 0.66   | 0.14                  | 0.25 | 0.17 | 0.08                  | 0.50 | 0.27 | 0.07                  | 0.28 | 0.17 | 0.07                  | 0.28 | 0.17 | 0.06                  | 0.27 | 0.18 | -                     | -    | -    | -                     | -    | -    | -                     | -    | -    | 0.06             | 0.50             | 0.19             |
|              | 8th      | 85.0   | 0.79   | 0.17                  | 0.26 | 0.20 | 0.05                  | 0.54 | 0.28 | 0.06                  | 0.34 | 0.20 | 0.09                  | 0.31 | 0.19 | 0.07                  | 0.29 | 0.18 | -                     | -    | -    | -                     | -    | -    | -                     | -    | -    | 0.05             | 0.54             | 0.21             |
|              | 9th      | 99.1   | 0.92   | 0.19                  | 0.30 | 0.24 | 0.09                  | 0.55 | 0.32 | 0.08                  | 0.73 | 0.27 | 0.08                  | 0.32 | 0.21 | 0.11                  | 0.34 | 0.21 | -                     | -    | -    | -                     | -    | -    | -                     | -    | -    | 0.08             | 0.73             | 0.25             |
| M2-OPC-16(B) | 1st      | 13.4   | 0.13   | 0.06                  | 0.07 | 0.06 | 0.04                  | 0.07 | 0.05 | -                     | -    | -    | -                     | -    | -    | -                     | -    | -    | -                     | -    | -    | -                     | -    | -    | -                     | -    | -    | 0.04             | 0.07             | 0.06             |
|              | 2nd      | 15.8   | 0.15   | 0.05                  | 0.08 | 0.07 | 0.05                  | 0.08 | 0.07 | 0.05                  | 0.07 | 0.06 | -                     | -    | -    | -                     | -    | -    | -                     | -    | -    | -                     | -    | -    | -                     | -    | -    | 0.05             | 0.08             | 0.06             |
|              | 3rd      | 18.0   | 0.17   | 0.08                  | 0.10 | 0.09 | 0.06                  | 0.09 | 0.08 | 0.06                  | 0.08 | 0.07 | 0.04                  | 0.08 | 0.06 | 0.07                  | 0.10 | 0.09 | -                     | -    | -    | -                     | -    | -    | -                     | -    | -    | 0.04             | 0.10             | 0.08             |
|              | 4th      | 33.2   | 0.31   | 0.11                  | 0.20 | 0.15 | 0.04                  | 0.20 | 0.11 | 0.12                  | 0.15 | 0.13 | 0.05                  | 0.18 | 0.11 | 0.17                  | 0.23 | 0.19 | -                     | -    | -    | -                     | -    | -    | -                     | -    | -    | 0.04             | 0.23             | 0.14             |
|              | 5th      | 48.1   | 0.45   | 0.02                  | 0.25 | 0.12 | 0.05                  | 0.26 | 0.13 | 0.11                  | 0.21 | 0.15 | 0.05                  | 0.27 | 0.15 | 0.04                  | 0.58 | 0.23 | -                     | -    | -    | -                     | -    | -    | -                     | -    | -    | 0.02             | 0.58             | 0.16             |
|              | 6th      | 63.2   | 0.59   | 0.11                  | 0.33 | 0.17 | 0.06                  | 0.27 | 0.16 | 0.09                  | 0.22 | 0.14 | 0.07                  | 0.33 | 0.19 | 0.05                  | 0.59 | 0.23 | 0.05                  | 0.11 | 0.09 | -                     | -    | -    | -                     | -    | -    | 0.05             | 0.59             | 0.16             |
|              | 7th      | 78.2   | 0.73   | 0.16                  | 0.37 | 0.22 | 0.10                  | 0.28 | 0.18 | 0.11                  | 0.23 | 0.17 | 0.04                  | 0.36 | 0.18 | 0.06                  | 0.61 | 0.24 | 0.08                  | 0.16 | 0.13 | -                     | -    | -    | -                     | -    | -    | 0.04             | 0.61             | 0.19             |
|              | 8th      | 96.2   | 0.90   | 0.17                  | 0.56 | 0.28 | 0.10                  | 0.32 | 0.22 | 0.13                  | 0.26 | 0.19 | 0.11                  | 0.48 | 0.25 | 0.08                  | 0.68 | 0.31 | 0.14                  | 0.17 | 0.16 | -                     | -    | -    | -                     | -    | -    | 0.08             | 0.68             | 0.23             |

\*All crack width measurements are in mm.



Table S5 Crack width regression analysis for each specimen.

| Specimen     | Crack widths (mm)                                                     |                                                                       |                                                                                   |
|--------------|-----------------------------------------------------------------------|-----------------------------------------------------------------------|-----------------------------------------------------------------------------------|
|              | Maximum                                                               | Average                                                               | Minimum                                                                           |
| M5-FA-10-(A) | $w_c = 0.25 \ln(\sigma_s/F_y) + 0.54$                                 | $w_c = 0.14 \ln(\sigma_s/F_y) + 0.28$                                 | $w_c = 0.002 \ln(\sigma_s/F_y) + 0.03877$                                         |
| M5-FA-10-(B) | $R^2 = 0.99$<br>$w_c = 0.35 \ln(\sigma_s/F_y) + 0.55$<br>$R^2 = 0.98$ | $R^2 = 0.96$<br>$w_c = 0.15 \ln(\sigma_s/F_y) + 0.25$<br>$R^2 = 0.98$ | $R^2 = 0.05882$<br>$w_c = -0.0004 \ln(\sigma_s/F_y) + 0.02860$<br>$R^2 = 0.00150$ |
| M5-FA-10-(C) | $w_c = 0.32 \ln(\sigma_s/F_y) + 0.47$<br>$R^2 = 1.00$                 | $w_c = 0.16 \ln(\sigma_s/F_y) + 0.24$<br>$R^2 = 0.98$                 | $w_c = 0.02 \ln(\sigma_s/F_y) + 0.06$<br>$R^2 = 0.54$                             |
| M5-FA-10-(D) | $w_c = 0.29 \ln(\sigma_s/F_y) + 0.47$<br>$R^2 = 0.96$                 | $w_c = 0.16 \ln(\sigma_s/F_y) + 0.26$<br>$R^2 = 0.99$                 | $w_c = 0.005 \ln(\sigma_s/F_y) + 0.04$<br>$R^2 = 0.01$                            |
| M5-FA-12-(A) | $w_c = 0.21 \ln(\sigma_s/F_y) + 0.44$<br>$R^2 = 0.97$                 | $w_c = 0.10 \ln(\sigma_s/F_y) + 0.20$<br>$R^2 = 0.92$                 | $w_c = 0.01 \ln(\sigma_s/F_y) + 0.04$<br>$R^2 = 0.07$                             |
| M5-FA-12-(B) | $w_c = 0.28 \ln(\sigma_s/F_y) + 0.53$<br>$R^2 = 0.98$                 | $w_c = 0.15 \ln(\sigma_s/F_y) + 0.29$<br>$R^2 = 0.99$                 | $w_c = 0.0009 \ln(\sigma_s/F_y) + 0.0435$<br>$R^2 = 0.0047$                       |
| M5-FA-12-(C) | $w_c = 0.26 \ln(\sigma_s/F_y) + 0.45$<br>$R^2 = 0.98$                 | $w_c = 0.14 \ln(\sigma_s/F_y) + 0.25$<br>$R^2 = 0.98$                 | $w_c = -0.001 \ln(\sigma_s/F_y) + 0.0420$<br>$R^2 = 0.0053$                       |
| M5-FA-12-(D) | $w_c = 0.30 \ln(\sigma_s/F_y) + 0.54$<br>$R^2 = 0.98$                 | $w_c = 0.09 \ln(\sigma_s/F_y) + 0.19$<br>$R^2 = 0.97$                 | $w_c = -0.006 \ln(\sigma_s/F_y) + 0.0277$<br>$R^2 = 0.3997$                       |
| M5-FA-16-(A) | $w_c = 0.21 \ln(\sigma_s/F_y) + 0.42$<br>$R^2 = 0.96$                 | $w_c = 0.10 \ln(\sigma_s/F_y) + 0.21$<br>$R^2 = 0.91$                 | $w_c = 0.0051 \ln(\sigma_s/F_y) + 0.0416$<br>$R^2 = 0.1443$                       |
| M5-FA-16-(B) | $w_c = 0.23 \ln(\sigma_s/F_y) + 0.45$<br>$R^2 = 0.98$                 | $w_c = 0.08 \ln(\sigma_s/F_y) + 0.18$<br>$R^2 = 1.00$                 | $w_c = 0.001 \ln(\sigma_s/F_y) + 0.0278$<br>$R^2 = 0.0172$                        |
| M5-FA-16-(C) | $w_c = 0.20 \ln(\sigma_s/F_y) + 0.45$<br>$R^2 = 0.99$                 | $w_c = 0.07 \ln(\sigma_s/F_y) + 0.17$<br>$R^2 = 0.99$                 | $w_c = 0.004 \ln(\sigma_s/F_y) + 0.0361$<br>$R^2 = 0.1085$                        |
| M5-FA-16-(D) | $w_c = 0.22 \ln(\sigma_s/F_y) + 0.40$<br>$R^2 = 1.00$                 | $w_c = 0.09 \ln(\sigma_s/F_y) + 0.19$<br>$R^2 = 0.99$                 | $w_c = -0.002 \ln(\sigma_s/F_y) + 0.032$<br>$R^2 = 0.037$                         |
| M8-FA-10-(A) | $w_c = 0.21 \ln(\sigma_s/F_y) + 0.59$<br>$R^2 = 0.89$                 | $w_c = 0.10 \ln(\sigma_s/F_y) + 0.30$<br>$R^2 = 0.85$                 | $w_c = 0.003 \ln(\sigma_s/F_y) + 0.036$<br>$R^2 = 0.061$                          |
| M8-FA-10-(B) | $w_c = 0.36 \ln(\sigma_s/F_y) + 0.72$<br>$R^2 = 0.99$                 | $w_c = 0.19 \ln(\sigma_s/F_y) + 0.42$<br>$R^2 = 0.98$                 | $w_c = -0.03 \ln(\sigma_s/F_y) + 0.02$<br>$R^2 = 0.37$                            |
| M8-FA-10-(C) | $w_c = 0.38 \ln(\sigma_s/F_y) + 0.58$<br>$R^2 = 0.96$                 | $w_c = 0.18 \ln(\sigma_s/F_y) + 0.29$<br>$R^2 = 0.90$                 | $w_c = 0.003 \ln(\sigma_s/F_y) + 0.041$<br>$R^2 = 0.079$                          |
| M8-FA-10-(D) | $w_c = 0.38 \ln(\sigma_s/F_y) + 0.62$<br>$R^2 = 0.96$                 | $w_c = 0.22 \ln(\sigma_s/F_y) + 0.36$<br>$R^2 = 0.91$                 | $w_c = 0.13 \ln(\sigma_s/F_y) + 0.21$<br>$R^2 = 0.84$                             |
| M8-FA-12-(A) | $w_c = 0.32 \ln(\sigma_s/F_y) + 0.62$<br>$R^2 = 0.99$                 | $w_c = 0.12 \ln(\sigma_s/F_y) + 0.26$<br>$R^2 = 0.98$                 | $w_c = 0.01 \ln(\sigma_s/F_y) + 0.06$<br>$R^2 = 0.33$                             |
| M8-FA-12-(B) | $w_c = 0.23 \ln(\sigma_s/F_y) + 0.08$<br>$R^2 = 0.99$                 | $w_c = 0.08 \ln(\sigma_s/F_y) + 0.05$<br>$R^2 = 0.90$                 | $w_c = 0.003 \ln(\sigma_s/F_y) + 0.027$<br>$R^2 = 0.055$                          |
| M8-FA-12-(C) | $w_c = 0.27 \ln(\sigma_s/F_y) + 0.48$<br>$R^2 = 0.98$                 | $w_c = 0.13 \ln(\sigma_s/F_y) + 0.24$<br>$R^2 = 0.98$                 | $w_c = 0.02 \ln(\sigma_s/F_y) + 0.05$<br>$R^2 = 0.70$                             |
| M8-FA-12-(D) | $w_c = 0.30 \ln(\sigma_s/F_y) + 0.52$<br>$R^2 = 0.98$                 | $w_c = 0.11 \ln(\sigma_s/F_y) + 0.22$<br>$R^2 = 0.98$                 | $w_c = 0.0004 \ln(\sigma_s/F_y) + 0.0397$<br>$R^2 = 0.0016$                       |
| M8-FA-16-(A) | $w_c = 0.20 \ln(\sigma_s/F_y) + 0.48$<br>$R^2 = 0.91$                 | $w_c = 0.08 \ln(\sigma_s/F_y) + 0.20$<br>$R^2 = 0.89$                 | $w_c = 0.001 \ln(\sigma_s/F_y) + 0.035$<br>$R^2 = 0.006$                          |
| M8-FA-16-(B) | $w_c = 0.20 \ln(\sigma_s/F_y) + 0.45$<br>$R^2 = 0.99$                 | $w_c = 0.08 \ln(\sigma_s/F_y) + 0.22$<br>$R^2 = 1.00$                 | $w_c = -0.004 \ln(\sigma_s/F_y) + 0.031$<br>$R^2 = 0.346$                         |
| M8-FA-16-(C) | $w_c = 0.20 \ln(\sigma_s/F_y) + 0.41$<br>$R^2 = 0.99$                 | $w_c = 0.09 \ln(\sigma_s/F_y) + 0.19$<br>$R^2 = 0.98$                 | $w_c = 0.01 \ln(\sigma_s/F_y) + 0.04$<br>$R^2 = 0.28$                             |
| M8-FA-16-(D) | $w_c = 0.19 \ln(\sigma_s/F_y) + 0.39$<br>$R^2 = 0.98$                 | $w_c = 0.09 \ln(\sigma_s/F_y) + 0.20$<br>$R^2 = 0.98$                 | $w_c = 0.01 \ln(\sigma_s/F_y) + 0.04$<br>$R^2 = 0.31$                             |
| M9-FA-10-(A) | $w_c = 0.38 \ln(\sigma_s/F_y) + 0.63$                                 | $w_c = 0.12 \ln(\sigma_s/F_y) + 0.23$                                 | $w_c = -0.01 \ln(\sigma_s/F_y) + 0.04$                                            |

| Specimen      | Crack widths (mm)                                         |                                                           |                                                                 |
|---------------|-----------------------------------------------------------|-----------------------------------------------------------|-----------------------------------------------------------------|
|               | Maximum<br>$R^2 = 0.96$                                   | Average<br>$R^2 = 0.94$                                   | Minimum<br>$R^2 = 0.03$                                         |
| M9-FA-10-(B)  | $w_c = 0.33 \ln(\sigma_s/F_y) + 0.54$<br>$R^2 = 0.99$     | $w_c = 0.15 \ln(\sigma_s/F_y) + 0.26$<br>$R^2 = 0.97$     | $w_c = 0.01 \ln(\sigma_s/F_y) + 0.06$<br>$R^2 = 0.48$           |
| M9-FA-10-(C)  | $w_c = 0.36 \ln(\sigma_s/F_y) + 0.63$<br>$R^2 = 0.94$     | $w_c = 0.17 \ln(\sigma_s/F_y) + 0.31$<br>$R^2 = 0.98$     | $w_c = 0.01 \ln(\sigma_s/F_y) + 0.06$<br>$R^2 = 0.09$           |
| M9-FA-10-(D)  | $w_c = 0.43 \ln(\sigma_s/F_y) + 0.78$<br>$R^2 = 0.99$     | $w_c = 0.15 \ln(\sigma_s/F_y) + 0.33$<br>$R^2 = 0.98$     | $w_c = 0.004 \ln(\sigma_s/F_y) + 0.056$<br>$R^2 = 0.098$        |
| M9-FA-12-(A)  | $w_c = 0.27 \ln(\sigma_s/F_y) + 0.49$<br>$R^2 = 0.97$     | $w_c = 0.11 \ln(\sigma_s/F_y) + 0.22$<br>$R^2 = 0.96$     | $w_c = 0.005 \ln(\sigma_s/F_y) + 0.044$<br>$R^2 = 0.128$        |
| M9-FA-12-(B)  | $w_c = 0.30 \ln(\sigma_s/F_y) + 0.49$<br><br>$R^2 = 0.94$ | $w_c = 0.12 \ln(\sigma_s/F_y) + 0.23$<br><br>$R^2 = 0.98$ | $w_c = 0.0004 \ln(\sigma_s/F_y) + 0.0392$<br><br>$R^2 = 0.0009$ |
| M9-FA-16-(A)  | $w_c = 0.18 \ln(\sigma_s/F_y) + 0.48$<br>$R^2 = 0.99$     | $w_c = 0.08 \ln(\sigma_s/F_y) + 0.22$<br>$R^2 = 0.96$     | $w_c = 0.005 \ln(\sigma_s/F_y) + 0.044$<br>$R^2 = 0.219$        |
| M9-FA-16-(B)  | $w_c = 0.17 \ln(\sigma_s/F_y) + 0.32$<br>$R^2 = 0.95$     | $w_c = 0.08 \ln(\sigma_s/F_y) + 0.18$<br>$R^2 = 0.98$     | $w_c = -0.001 \ln(\sigma_s/F_y) + 0.040$<br>$R^2 = 0.011$       |
| M9-FA-16-(C)  | $w_c = 0.21 \ln(\sigma_s/F_y) + 0.41$<br>$R^2 = 0.94$     | $w_c = 0.08 \ln(\sigma_s/F_y) + 0.19$<br>$R^2 = 0.98$     | $w_c = 0.002 \ln(\sigma_s/F_y) + 0.039$<br>$R^2 = 0.051$        |
| M9-FA-16-(D)  | $w_c = 0.21 \ln(\sigma_s/F_y) + 0.41$<br>$R^2 = 0.97$     | $w_c = 0.10 \ln(\sigma_s/F_y) + 0.21$<br>$R^2 = 0.99$     | $w_c = 0.008 \ln(\sigma_s/F_y) + 0.043$<br>$R^2 = 0.120$        |
| M1-OPC-12-(A) | $w_c = 0.39 \ln(\sigma_s/F_y) + 0.71$<br>$R^2 = 0.78$     | $w_c = 0.15 \ln(\sigma_s/F_y) + 0.33$<br>$R^2 = 0.88$     | $w_c = -0.01 \ln(\sigma_s/F_y) + 0.04$<br>$R^2 = 0.13$          |
| M1-OPC-12-(B) | $w_c = 0.21 \ln(\sigma_s/F_y) + 0.53$<br>$R^2 = 0.87$     | $w_c = 0.14 \ln(\sigma_s/F_y) + 0.33$<br>$R^2 = 0.87$     | $w_c = 0.06 \ln(\sigma_s/F_y) + 0.12$<br>$R^2 = 0.20$           |
| M2-OPC-16-(A) | $w_c = 0.27 \ln(\sigma_s/F_y) + 0.63$<br>$R^2 = 0.93$     | $w_c = 0.09 \ln(\sigma_s/F_y) + 0.23$<br>$R^2 = 0.97$     | $w_c = 0.01 \ln(\sigma_s/F_y) + 0.06$<br>$R^2 = 0.45$           |
| M2-OPC-16-(B) | $w_c = 0.34 \ln(\sigma_s/F_y) + 0.74$<br>$R^2 = 0.94$     | $w_c = 0.08 \ln(\sigma_s/F_y) + 0.22$<br>$R^2 = 0.97$     | $w_c = 0.01 \ln(\sigma_s/F_y) + 0.05$<br>$R^2 = 0.13$           |
